# Supplementary material for: DFT investigation of the ring contraction reaction of (η4-1,2-disilacyclohexadiene)iron tricarbonyls: a crucial intramolecular Si–Si bond activation
Source: Royal Society of Chemistry journal article supplement (doi:10.1039/c5qo00402k), 2016-01-01
Supplement: c5qo00402k1.pdf [file c5qo00402k1.pdf]

Supporting Information for the Paper entitled

## **DFT Investigation of the Ring Contraction Reaction of ( $\eta^4$ -1,2-disilacyclohexadiene)iron Tricarbonyls: A Crucial Intramolecular Si–Si Bond Activation**

**Changzhi Lin,<sup>a</sup> Qian Liu,<sup>\*b</sup> Yang Zhang,<sup>c</sup> Jie Liu<sup>c</sup> and Chenggang Zheng<sup>a</sup>**

<sup>a</sup> State Key Laboratory of Shale Oil and Gas Enrichment Mechanisms and Effective Development, Petroleum exploration and production research institute, Sinopec, Beijing 100083, China; <sup>b</sup> Department of Chemical and Materials Engineering, University of Alberta, Edmonton, AB, T6G 2V4, Canada; <sup>c</sup>Department of Chemistry, Nankai University, Tianjin 300071, People's Republic of China.

E-mail: <sup>\*b</sup> liuqian331@sdu.edu.cn.

Gaussian 09, Revision B.01,

M. J. Frisch, G. W. Trucks, H. B. Schlegel, G. E. Scuseria, M. A. Robb, J. R. Cheeseman, G. Scalmani, V. Barone, B. Mennucci, G. A. Petersson, H. Nakatsuji, M. Caricato, X. Li, H. P. Hratchian, A. F. Izmaylov, J. Bloino, G. Zheng, J. L. Sonnenberg, M. Hada, M. Ehara, K. Toyota, R. Fukuda, J. Hasegawa, M. Ishida, T. Nakajima, Y. Honda, O. Kitao, H. Nakai, T. Vreven, J. A. Montgomery, Jr., J. E. Peralta, F. Ogliaro, M. Bearpark, J. J. Heyd, E. Brothers, K. N. Kudin, V. N. Staroverov, R. Kobayashi, J. Normand, K. Raghavachari, A. Rendell, J. C. Burant, S. S. Iyengar, J. Tomasi, M. Cossi, N. Rega, J. M. Millam, M. Klene, J. E. Knox, J. B. Cross, V. Bakken, C. Adamo, J. Jaramillo, R. Gomperts, R. E. Stratmann, O. Yazyev, A. J. Austin, R. Cammi, C. Pomelli, J. W. Ochterski, R. L. Martin, K. Morokuma, V. G. Zakrzewski, G. A. Voth, P. Salvador, J. J. Dannenberg, S. Dapprich, A. D. Daniels, O. Farkas, J. B. Foresman, J. V. Ortiz, J. Cioslowski, and D. J. Fox, Gaussian, Inc., Wallingford CT, 2009.

Figure S1. Optimized structures and bond lengths (Å) in the ring contraction reaction of 1b. The hydrogen atoms are omitted.

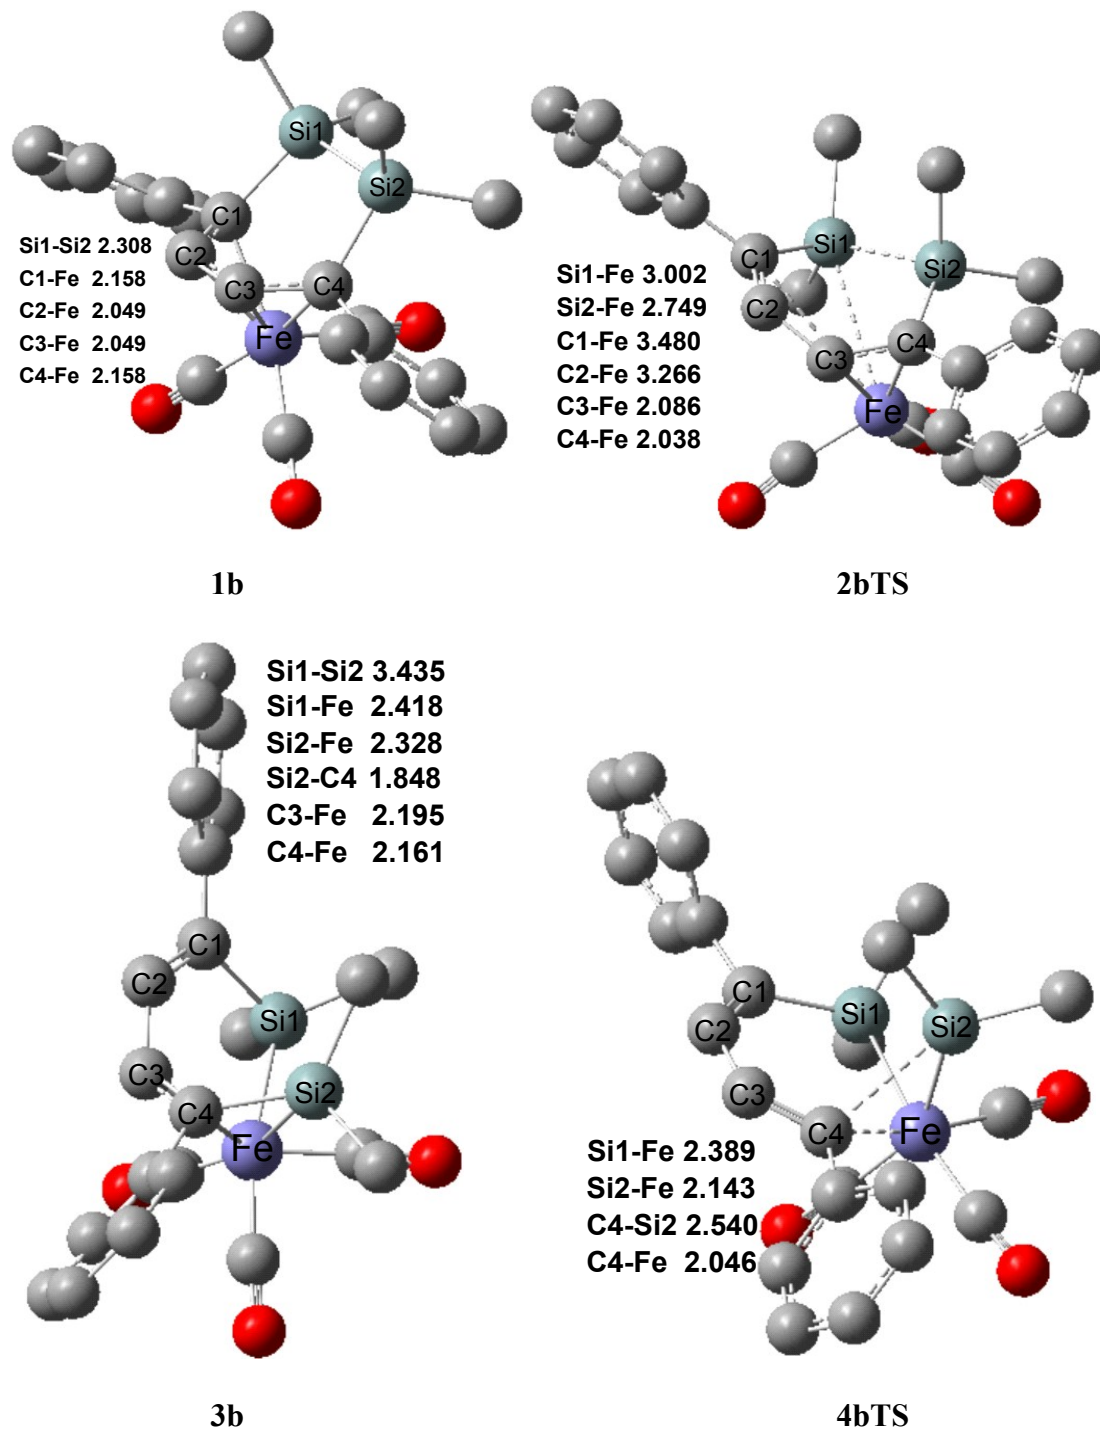

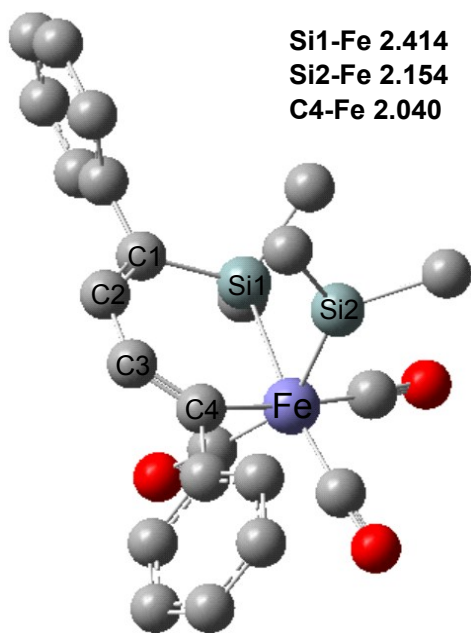

**5b**

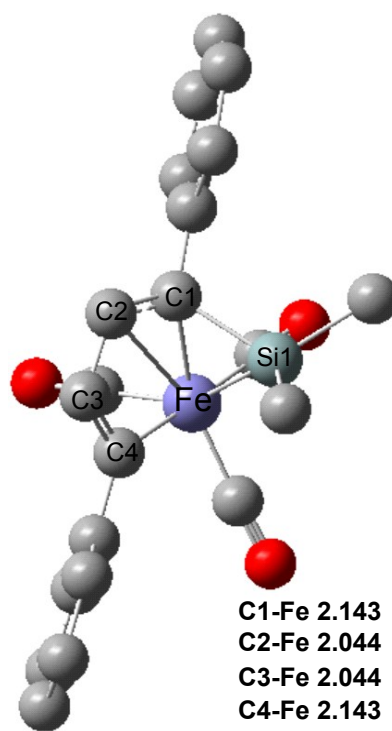

**6b**

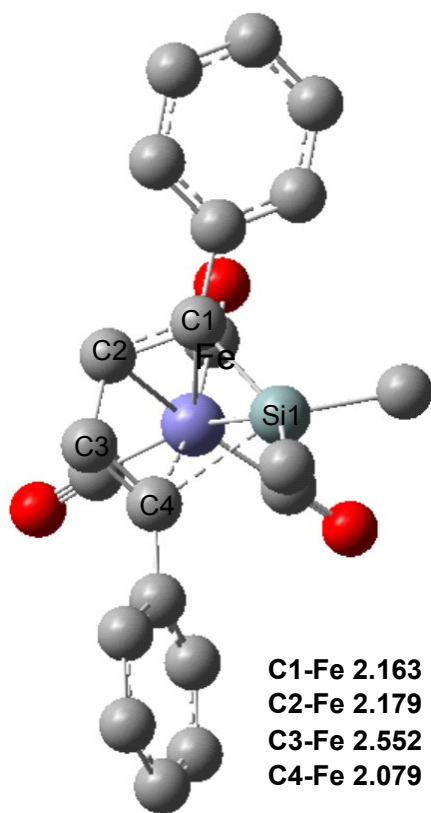

**7bTS**

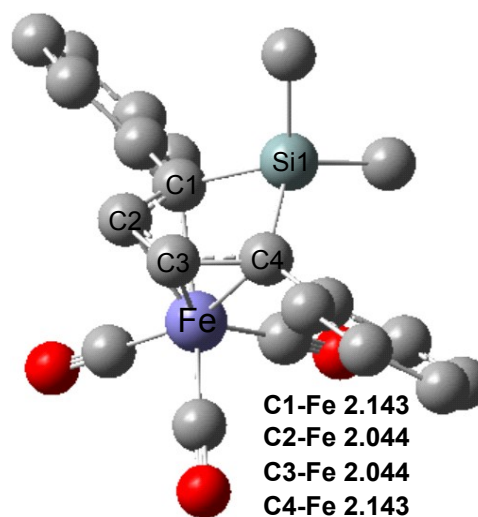

**8b**

**Table S1. M06-optimized energies and thermochemistry (Hartree) for three reaction systems at 298 K and 1 atm.**

| <b>Complexes</b>        | $E_{\text{SCF}}$ | $H_{\text{corr}}$ | $G_{\text{corr}}$ |
|-------------------------|------------------|-------------------|-------------------|
| <b>1a</b>               | -1356.502131     | 0.267164          | 0.194110          |
| <b>2aTS</b>             | -1356.449075     | 0.266169          | 0.195149          |
| <b>3a</b>               | -1356.483478     | 0.267690          | 0.196078          |
| <b>4aTS</b>             | -1356.445646     | 0.265695          | 0.193525          |
| <b>5a</b>               | -1356.448366     | 0.266911          | 0.193581          |
| <b>6a</b>               | -987.1979425     | 0.184577          | 0.122077          |
| <b>7aTS</b>             | -987.1878915     | 0.183290          | 0.123411          |
| <b>8a</b>               | -987.2539221     | 0.185596          | 0.125580          |
| <b>SiMe<sub>2</sub></b> | -369.161014      | 0.077780          | 0.043679          |
| <b>SiP2</b>             | -738.415632      | 0.161116          | 0.112895          |
| <b>SiP3</b>             | -1107.691960     | 0.242239          | 0.176264          |
| <b>SiP4</b>             | -1476.975360     | 0.324603          | 0.253005          |
| <b>SiP5</b>             | -1846.242950     | 0.405661          | 0.321011          |
| <b>SiP6</b>             | -2215.502185     | 0.487162          | 0.388008          |
| <b>1b</b>               | -1818.244506     | 0.438276          | 0.345187          |
| <b>2bTS</b>             | -1818.188103     | 0.437436          | 0.344710          |
| <b>3b</b>               | -1818.223983     | 0.438586          | 0.344475          |
| <b>4bTS</b>             | -1818.187738     | 0.436679          | 0.343089          |
| <b>5b</b>               | -1818.188876     | 0.437991          | 0.343054          |
| <b>6b</b>               | -1448.95096      | 0.355868          | 0.271425          |
| <b>7bTS</b>             | -1448.933288     | 0.354589          | 0.272789          |
| <b>8b</b>               | -1448.997767     | 0.356379          | 0.272256          |
| <b>1c</b>               | -2279.956307     | 0.608808          | 0.496175          |
| <b>2cTS</b>             | -2279.912734     | 0.606686          | 0.494827          |
| <b>3c</b>               | -2279.954473     | 0.609460          | 0.495768          |
| <b>4cTS</b>             | -2279.913365     | 0.607035          | 0.493010          |
| <b>5c</b>               | -2279.914414     | 0.608140          | 0.493366          |
| <b>6c</b>               | -1910.690242     | 0.527452          | 0.423742          |

|             |              |          |          |
|-------------|--------------|----------|----------|
| <b>7cTS</b> | -1910.676217 | 0.525909 | 0.424388 |
| <b>8c</b>   | -1910.734709 | 0.527079 | 0.424001 |

---

## Cartesian Coordinates of M06-Optimized Structures in Gas

### 1a

|    |             |             |             |
|----|-------------|-------------|-------------|
| Fe | -1.39670400 | 0.00001900  | -0.10599000 |
| C  | -2.62518800 | 1.28070400  | -0.12014400 |
| C  | -0.97749900 | -0.00015500 | 1.62019700  |
| C  | -2.62522600 | -1.28061800 | -0.12028300 |
| O  | -3.39827400 | 2.13497000  | -0.13133900 |
| O  | -0.72070600 | -0.00036900 | 2.74492000  |
| O  | -3.39833600 | -2.13486100 | -0.13156700 |
| C  | -0.48536500 | -0.70902500 | -1.79782100 |
| C  | 0.06679700  | -1.43047200 | -0.69615800 |
| C  | 0.06681800  | 1.43051000  | -0.69613500 |
| C  | -0.48534100 | 0.70908500  | -1.79780800 |
| H  | -1.06992000 | -1.21517100 | -2.56837900 |
| H  | -1.06989400 | 1.21526400  | -2.56834600 |
| Si | 1.78705000  | -1.15845400 | 0.02932300  |
| Si | 1.78699900  | 1.15847500  | 0.02944700  |
| C  | 3.06285600  | -1.89473600 | -1.15745300 |
| H  | 2.93810500  | -2.98166600 | -1.25616800 |
| H  | 2.96054100  | -1.45284600 | -2.15794000 |
| H  | 4.08821400  | -1.70626800 | -0.81159200 |
| C  | 1.91911800  | -2.03555400 | 1.69253100  |
| H  | 1.26390500  | -1.59405700 | 2.45272000  |
| H  | 1.65190400  | -3.09663100 | 1.58987500  |
| H  | 2.94934400  | -1.98943100 | 2.06892200  |
| C  | 3.06278500  | 1.89490500  | -1.15727000 |
| H  | 4.08816300  | 1.70637500  | -0.81149500 |
| H  | 2.96039900  | 1.45313000  | -2.15780100 |
| H  | 2.93806200  | 2.98185000  | -1.25586200 |
| C  | 1.91902400  | 2.03547800  | 1.69271100  |
| H  | 1.26496400  | 1.59305500  | 2.45335600  |
| H  | 2.94959200  | 1.99067400  | 2.06832600  |
| H  | 1.65033400  | 3.09621800  | 1.59041400  |
| H  | -0.27008300 | 2.47519900  | -0.66670200 |
| H  | -0.27015700 | -2.47514200 | -0.66669800 |

### 2aTS

|    |             |             |             |
|----|-------------|-------------|-------------|
| Fe | 0.00000000  | 0.00000000  | 0.00000000  |
| C  | 0.00000000  | 0.00000000  | 1.72944476  |
| C  | 1.76711295  | 0.00000000  | 0.05939951  |
| C  | -0.27480874 | -1.66064940 | -0.61493047 |
| O  | -0.04112010 | -0.03780542 | 2.88556684  |
| O  | 2.92158589  | 0.04179416  | 0.06910321  |
| O  | -0.48274645 | -2.76111567 | -0.88658100 |

|    |             |             |             |
|----|-------------|-------------|-------------|
| C  | -2.22854857 | 0.33364265  | -1.95852318 |
| C  | -1.41645838 | 0.72128661  | -2.96101989 |
| C  | -1.37960558 | 1.43736154  | 0.21855438  |
| C  | -1.98887360 | 0.36267210  | -0.49608808 |
| H  | -3.21851374 | -0.06049038 | -2.21588098 |
| H  | -2.70158880 | -0.24868680 | 0.06446384  |
| Si | 0.32412743  | 1.35858831  | -2.70476998 |
| Si | -0.15742768 | 2.55897005  | -0.64925180 |
| C  | 0.66790847  | 2.75672812  | -3.93829964 |
| H  | 0.81001812  | 2.31506504  | -4.93500613 |
| H  | -0.15380255 | 3.47805833  | -4.00437805 |
| H  | 1.58638121  | 3.30484129  | -3.69003548 |
| C  | 1.66019069  | 0.08306772  | -3.10172344 |
| H  | 1.49140856  | -0.89874093 | -2.64818685 |
| H  | 1.68410300  | -0.04589510 | -4.19329969 |
| H  | 2.65272120  | 0.43782095  | -2.79417057 |
| C  | -1.09452896 | 4.00859990  | -1.44346129 |
| H  | -0.40948360 | 4.70152147  | -1.94835652 |
| H  | -1.85569255 | 3.67426265  | -2.15789443 |
| H  | -1.59995560 | 4.55855625  | -0.63763324 |
| C  | 1.12308007  | 3.28424518  | 0.53263099  |
| H  | 0.88603193  | 2.98378868  | 1.56252807  |
| H  | 2.13999134  | 2.93483820  | 0.31857493  |
| H  | 1.12554759  | 4.38093002  | 0.48795020  |
| H  | -1.73833791 | 1.65829029  | 1.22745031  |
| H  | -1.83590375 | 0.67487170  | -3.97090414 |

### 3a

|    |             |             |             |
|----|-------------|-------------|-------------|
| Fe | -0.24405900 | 0.74534900  | -0.05557700 |
| C  | -1.58085000 | 1.90352000  | -0.25067400 |
| C  | -0.35113200 | 0.11597900  | -1.67064900 |
| C  | 0.96292700  | 2.03415100  | 0.09925000  |
| O  | -2.44106400 | 2.65207800  | -0.42485100 |
| O  | -0.46877400 | -0.28440000 | -2.75744000 |
| O  | 1.71874100  | 2.90110600  | 0.20090800  |
| C  | 1.12051200  | -0.57911000 | 2.40873300  |
| C  | 1.89939600  | -1.18556900 | 1.50831100  |
| C  | -1.24766300 | 0.04605600  | 1.69612000  |
| C  | 0.04601400  | 0.39748600  | 2.11227700  |
| H  | 1.23342700  | -0.78392300 | 3.48096600  |
| H  | 0.11647400  | 1.31968700  | 2.70143200  |
| Si | 1.74145300  | -0.61607800 | -0.26736500 |
| Si | -1.58296900 | -1.13764500 | 0.34184000  |
| C  | 1.76623600  | -2.07571600 | -1.47386600 |

|   |              |              |              |
|---|--------------|--------------|--------------|
| H | 2. 63921000  | -2. 70243000 | -1. 23914000 |
| H | 0. 87558000  | -2. 71227300 | -1. 45015300 |
| H | 1. 88902900  | -1. 70933800 | -2. 50136200 |
| C | 3. 29856100  | 0. 33995800  | -0. 75840000 |
| H | 3. 61509400  | 1. 06999400  | -0. 00558700 |
| H | 4. 11772000  | -0. 37829600 | -0. 90521600 |
| H | 3. 15103900  | 0. 87309700  | -1. 70796800 |
| C | -1. 03090000 | -2. 92561900 | 0. 39388100  |
| H | -1. 07521800 | -3. 37545300 | -0. 60614700 |
| H | -0. 02633900 | -3. 06173000 | 0. 80477700  |
| H | -1. 74135100 | -3. 47380100 | 1. 02849300  |
| C | -3. 32521200 | -1. 03909800 | -0. 34126900 |
| H | -3. 77448600 | -0. 05830900 | -0. 14157300 |
| H | -3. 31019600 | -1. 17910100 | -1. 43073800 |
| H | -3. 97680000 | -1. 81398200 | 0. 08268400  |
| H | 2. 61776000  | -1. 93661200 | 1. 85106200  |
| H | -2. 04274700 | 0. 75301800  | 1. 94961400  |

#### 4aTS

|    |              |              |              |
|----|--------------|--------------|--------------|
| Fe | -0. 59064100 | -0. 65473000 | -0. 13443800 |
| C  | -2. 19457600 | -1. 14399000 | -0. 72840300 |
| C  | -1. 03647700 | -0. 89277400 | 1. 55733300  |
| C  | 0. 42030700  | -2. 07079200 | -0. 53520100 |
| O  | -3. 24256500 | -1. 44972000 | -1. 10051200 |
| O  | -1. 32544500 | -0. 98392400 | 2. 67398700  |
| O  | 1. 09518200  | -2. 94460000 | -0. 86504100 |
| C  | 2. 37453700  | 0. 57319700  | -1. 83591400 |
| C  | 2. 62598800  | 0. 57215600  | -0. 51026700 |
| C  | -0. 08545500 | -0. 03189100 | -1. 99210700 |
| C  | 1. 10762900  | 0. 32983100  | -2. 51284800 |
| H  | 3. 19999100  | 0. 80653400  | -2. 51610900 |
| H  | 1. 15205200  | 0. 46807600  | -3. 59841600 |
| Si | 1. 43320600  | 0. 14626100  | 0. 85807600  |
| Si | -0. 90829400 | 1. 46153600  | -0. 15911700 |
| C  | 1. 27843600  | 1. 60412300  | 2. 08119300  |
| H  | 2. 26191700  | 1. 80187000  | 2. 53273300  |
| H  | 0. 93353100  | 2. 55705600  | 1. 65367500  |
| H  | 0. 59604700  | 1. 32838600  | 2. 89935400  |
| C  | 2. 22008000  | -1. 19183500 | 1. 93965600  |
| H  | 2. 44208600  | -2. 10793400 | 1. 38000500  |
| H  | 3. 16494500  | -0. 80931300 | 2. 35292300  |
| H  | 1. 57219100  | -1. 45520600 | 2. 78656900  |
| C  | -0. 09650600 | 2. 95288400  | -0. 95185200 |
| H  | -0. 15053400 | 3. 81062300  | -0. 26728800 |



|   |             |             |             |
|---|-------------|-------------|-------------|
| H | 0.93909200  | 2.77869400  | -1.25724300 |
| H | -0.67666300 | 3.22202800  | -1.84742200 |
| C | -2.36326800 | 2.20387200  | 0.79021600  |
| H | -3.19152000 | 1.49226000  | 0.89009600  |
| H | -2.00497300 | 2.42141700  | 1.81073700  |
| H | -2.73219200 | 3.14681600  | 0.36701400  |
| H | -0.87464800 | -0.15682100 | -2.74056300 |
| H | 3.65503800  | 0.80660600  | -0.21441100 |

### 5a

|    |             |             |             |
|----|-------------|-------------|-------------|
| Fe | -0.69864500 | -0.59032000 | 0.10924900  |
| C  | -2.29353100 | -1.17211300 | -0.40882800 |
| C  | -1.27388600 | 0.04124600  | 1.66132900  |
| C  | 0.13158700  | -2.08611500 | 0.61519500  |
| O  | -3.32318900 | -1.54791400 | -0.76556200 |
| O  | -1.62891400 | 0.50661800  | 2.65845700  |
| O  | 0.70231900  | -3.04912600 | 0.88618600  |
| C  | 2.51853300  | -0.80994000 | -1.59332800 |
| C  | 2.70752100  | -0.13082800 | -0.44427500 |
| C  | 0.00876800  | -1.13752200 | -1.69665700 |
| C  | 1.25684900  | -1.21451700 | -2.19844600 |
| H  | 3.40146400  | -1.08651500 | -2.17887700 |
| H  | 1.36175500  | -1.63300000 | -3.20540400 |
| Si | 1.38981200  | 0.44997300  | 0.72589500  |
| Si | -0.68934500 | 1.36642800  | -0.78649000 |
| C  | 1.52741700  | 2.36323100  | 0.84898500  |
| H  | 2.55016000  | 2.55286600  | 1.20991100  |
| H  | 1.41905800  | 2.94564500  | -0.07695400 |
| H  | 0.83454600  | 2.77002100  | 1.59974300  |
| C  | 1.82483400  | -0.06474500 | 2.49116800  |
| H  | 1.84233500  | -1.15455800 | 2.60921200  |
| H  | 2.82510100  | 0.32076000  | 2.73673800  |
| H  | 1.11818100  | 0.35029800  | 3.22141300  |
| C  | 0.04774700  | 1.93951300  | -2.41483700 |
| H  | 0.00888300  | 3.03104000  | -2.51823800 |
| H  | 1.08397500  | 1.59185300  | -2.51194500 |
| H  | -0.50784300 | 1.48826100  | -3.24881700 |
| C  | -1.62794200 | 2.84459700  | -0.09291100 |
| H  | -1.91028500 | 2.71053600  | 0.95767300  |
| H  | -1.06557500 | 3.78123000  | -0.20152800 |
| H  | -2.55636400 | 2.95819300  | -0.67374000 |
| H  | -0.76100800 | -1.51554000 | -2.37764300 |
| H  | 3.74473800  | 0.09414800  | -0.17070500 |

**6a**

|    |             |             |             |
|----|-------------|-------------|-------------|
| Fe | 0.59497400  | 0.16897700  | 0.09521800  |
| C  | -0.09633000 | 0.54956900  | 1.64377900  |
| C  | 0.66188200  | 1.84272000  | -0.53276500 |
| C  | 2.37426300  | -0.01806000 | 0.25219600  |
| O  | -0.55578800 | 0.73468400  | 2.69296300  |
| O  | 0.69531700  | 2.92074300  | -0.93935800 |
| O  | 3.50264800  | -0.16199600 | 0.42832900  |
| C  | 0.58904100  | -1.34938600 | -1.65109600 |
| C  | -0.47985700 | -0.47156400 | -1.71310100 |
| C  | 0.56024500  | -1.77103600 | 0.58813000  |
| C  | 0.65340700  | -2.38217400 | -0.59235500 |
| H  | 1.34305500  | -1.32664600 | -2.44478000 |
| H  | 0.76056600  | -3.44730800 | -0.81369700 |
| Si | -1.64710400 | -0.18072600 | -0.30525000 |
| C  | -2.61614800 | -1.51576900 | 0.57973000  |
| H  | -2.18622600 | -2.51078900 | 0.43726400  |
| H  | -2.63129000 | -1.30127200 | 1.65723400  |
| H  | -3.65501500 | -1.51926800 | 0.22566000  |
| C  | -2.72244300 | 1.33386400  | -0.56636800 |
| H  | -2.21452500 | 2.09038600  | -1.17743200 |
| H  | -3.67616900 | 1.08122100  | -1.04779900 |
| H  | -2.95620000 | 1.79387800  | 0.40354400  |
| H  | 0.57496600  | -2.25588300 | 1.56527400  |
| H  | -0.45079900 | 0.27602200  | -2.51180500 |

**7aTS**

|    |             |             |             |
|----|-------------|-------------|-------------|
| Fe | 0.64899200  | 0.05229400  | 0.03914900  |
| C  | 0.29191700  | 1.13879400  | 1.37767800  |
| C  | 1.34125500  | 1.33629600  | -0.95326800 |
| C  | 2.22606600  | -0.72713100 | 0.49393900  |
| O  | 0.06998500  | 1.81500400  | 2.28979100  |
| O  | 1.76011600  | 2.17542000  | -1.62607900 |
| O  | 3.22223900  | -1.19164000 | 0.83457800  |
| C  | 0.24285100  | -1.54399100 | -1.35324700 |
| C  | -0.59869700 | -0.44577400 | -1.60869900 |
| C  | -0.42946400 | -1.53516200 | 0.83182600  |
| C  | -0.14337500 | -2.36516300 | -0.18789200 |
| H  | 0.97452400  | -1.89331100 | -2.08315400 |
| H  | -0.13071500 | -3.45936100 | -0.19228100 |
| Si | -1.69617300 | 0.00169900  | -0.19682600 |
| C  | -3.21261900 | -0.95494200 | 0.39924500  |
| H  | -3.30720700 | -0.88191600 | 1.49132500  |
| H  | -4.11650800 | -0.51107600 | -0.03935800 |

|   |             |             |             |
|---|-------------|-------------|-------------|
| H | -3.16707000 | -2.01693600 | 0.13747300  |
| C | -2.28786300 | 1.79231100  | -0.31598100 |
| H | -1.57371000 | 2.40128900  | -0.88498400 |
| H | -3.27504200 | 1.85927500  | -0.79399600 |
| H | -2.38015900 | 2.24409300  | 0.68110900  |
| H | -0.70978400 | -1.84292500 | 1.83848400  |
| H | -0.44084000 | 0.15574500  | -2.50484800 |

**8a**

|    |             |             |             |
|----|-------------|-------------|-------------|
| Fe | -0.81695700 | -0.06885900 | 0.00005000  |
| C  | -2.02987300 | -0.17846100 | -1.28821600 |
| C  | -0.60954900 | 1.70343100  | -0.00155400 |
| C  | -2.02939100 | -0.17556000 | 1.28887300  |
| O  | -2.79086600 | -0.25436900 | -2.15022100 |
| O  | -0.56127000 | 2.85454600  | -0.00248300 |
| O  | -2.79013900 | -0.24939400 | 2.15127400  |
| C  | 0.14705300  | -1.71478400 | 0.71489200  |
| C  | 0.81517800  | -0.58057200 | 1.26521100  |
| C  | 0.81543000  | -0.58244600 | -1.26466500 |
| C  | 0.14721800  | -1.71578000 | -0.71281000 |
| H  | -0.38183400 | -2.47131200 | 1.29293500  |
| H  | -0.38173400 | -2.47311200 | -1.28975900 |
| Si | 2.07268200  | 0.00768000  | 0.00000400  |
| C  | 3.67241900  | -0.99110900 | 0.00078100  |
| H  | 4.28264600  | -0.76513300 | 0.88598200  |
| H  | 3.46087700  | -2.06824800 | 0.00144700  |
| H  | 4.28301700  | -0.76623900 | -0.88443400 |
| C  | 2.51972400  | 1.83590000  | -0.00120400 |
| H  | 2.13254400  | 2.35697600  | -0.88491200 |
| H  | 2.13247500  | 2.35803100  | 0.88185800  |
| H  | 3.61169500  | 1.94524600  | -0.00123300 |
| H  | 0.76615600  | -0.42003000 | 2.34149900  |
| H  | 0.76644400  | -0.42333900 | -2.34114800 |

**SiMe<sub>2</sub>**

|    |             |             |             |
|----|-------------|-------------|-------------|
| Si | 0.00001700  | -0.77283100 | -0.00002300 |
| C  | 1.42293300  | 0.50712000  | -0.00989700 |
| H  | 1.49137800  | 0.91194300  | 1.01500700  |
| H  | 2.40365400  | 0.08613400  | -0.25696800 |
| H  | 1.22381800  | 1.36913200  | -0.66315400 |
| C  | -1.42294900 | 0.50709600  | 0.00983600  |
| H  | -2.40365200 | 0.08571700  | 0.25632100  |
| H  | -1.22413000 | 1.36841500  | 0.66410300  |
| H  | -1.49121300 | 0.91300100  | -1.01462100 |

**SiP2**

|    |             |             |             |
|----|-------------|-------------|-------------|
| Si | -1.06282000 | -0.00000100 | 0.25675100  |
| Si | 1.06282000  | -0.00000100 | -0.25675100 |
| C  | -2.07981700 | 1.55720800  | -0.08244200 |
| H  | -1.44456800 | 2.45109300  | -0.07765400 |
| H  | -2.58529400 | 1.50000000  | -1.05475100 |
| H  | -2.85083800 | 1.69316000  | 0.68663400  |
| C  | -2.07982600 | -1.55720600 | -0.08242700 |
| H  | -2.58530300 | -1.50001300 | -1.05473700 |
| H  | -1.44458200 | -2.45109500 | -0.07762300 |
| H  | -2.85084800 | -1.69314300 | 0.68665100  |
| C  | 2.07982600  | -1.55720600 | 0.08242700  |
| H  | 1.44458200  | -2.45109500 | 0.07762300  |
| H  | 2.85084800  | -1.69314300 | -0.68665100 |
| H  | 2.58530300  | -1.50001300 | 1.05473700  |
| C  | 2.07981700  | 1.55720800  | 0.08244200  |
| H  | 2.85083800  | 1.69316000  | -0.68663400 |
| H  | 1.44456800  | 2.45109300  | 0.07765400  |
| H  | 2.58529400  | 1.50000000  | 1.05475100  |

**SiP3**

|    |             |             |             |
|----|-------------|-------------|-------------|
| Si | -0.67450500 | 1.16885900  | 0.00000000  |
| Si | 1.34951400  | -0.00029100 | 0.00000000  |
| Si | -0.67500900 | -1.16856800 | 0.00000000  |
| C  | -1.19112700 | 2.06309300  | 1.58414700  |
| H  | -0.74522000 | 3.06375300  | 1.64499800  |
| H  | -2.28125100 | 2.16903900  | 1.64918800  |
| H  | -0.85727700 | 1.49424000  | 2.46245900  |
| C  | -1.19112700 | 2.06309300  | -1.58414700 |
| H  | -2.28125100 | 2.16903900  | -1.64918800 |
| H  | -0.74522000 | 3.06375300  | -1.64499800 |
| H  | -0.85727700 | 1.49424000  | -2.46245900 |
| C  | -1.19112700 | -2.06309300 | 1.58414700  |
| H  | -2.28067800 | -2.17725600 | 1.64499800  |
| H  | -0.73781700 | -3.06014000 | 1.64918800  |
| H  | -0.86541100 | -1.48954300 | 2.46245900  |
| C  | -1.19112700 | -2.06309300 | -1.58414700 |
| H  | -0.73781700 | -3.06014000 | -1.64918800 |
| H  | -2.28067800 | -2.17725600 | -1.64499800 |
| H  | -0.86541100 | -1.48954300 | -2.46245900 |
| C  | 2.38225400  | 0.00000000  | 1.58414700  |
| H  | 3.02589800  | -0.88649700 | 1.64499800  |
| H  | 3.01906800  | 0.89110200  | 1.64918800  |

|             |              |              |              |
|-------------|--------------|--------------|--------------|
| H           | 1. 72268800  | -0. 00469700 | 2. 46245900  |
| C           | 2. 38225400  | 0. 00000000  | -1. 58414700 |
| H           | 3. 01906800  | 0. 89110200  | -1. 64918800 |
| H           | 3. 02589800  | -0. 88649700 | -1. 64499800 |
| H           | 1. 72268800  | -0. 00469700 | -2. 46245900 |
| <b>SiP4</b> |              |              |              |
| Si          | 1. 63917300  | 0. 01309200  | 0. 22375600  |
| Si          | -0. 01280600 | 1. 63911900  | -0. 22344000 |
| Si          | -1. 63857600 | -0. 01292700 | 0. 22442300  |
| Si          | 0. 01321200  | -1. 63862000 | -0. 22469300 |
| C           | 0. 02654900  | -3. 20090800 | 0. 84818300  |
| H           | -0. 85675000 | -3. 82496600 | 0. 66043900  |
| H           | 0. 91760500  | -3. 81260200 | 0. 65634700  |
| H           | 0. 02709300  | -2. 93442300 | 1. 91409000  |
| C           | 0. 01593200  | -2. 08244600 | -2. 07114100 |
| H           | 0. 90860700  | -2. 66016500 | -2. 34499800 |
| H           | -0. 86921800 | -2. 67147000 | -2. 34530400 |
| H           | 0. 01028200  | -1. 17148800 | -2. 68702300 |
| C           | -2. 08253000 | -0. 01663800 | 2. 07084100  |
| H           | -2. 67163700 | 0. 86833500  | 2. 34539600  |
| H           | -2. 66018100 | -0. 90948800 | 2. 34426700  |
| H           | -1. 17159000 | -0. 01118100 | 2. 68675700  |
| C           | -3. 20074000 | -0. 02558100 | -0. 84863400 |
| H           | -3. 81278300 | -0. 91643300 | -0. 65696700 |
| H           | -3. 82450100 | 0. 85792700  | -0. 66089300 |
| H           | -2. 93411100 | -0. 02612000 | -1. 91450500 |
| C           | -0. 02577200 | 3. 20066700  | 0. 85050700  |
| H           | 0. 85729000  | 3. 82502600  | 0. 66265300  |
| H           | -0. 91706500 | 3. 81232100  | 0. 65965600  |
| H           | -0. 02561200 | 2. 93344200  | 1. 91622900  |
| C           | -0. 01622800 | 2. 08404200  | -2. 06962600 |
| H           | -0. 90902300 | 2. 66186700  | -2. 34286600 |
| H           | 0. 86880300  | 2. 67322500  | -2. 34382700 |
| H           | -0. 01077600 | 1. 17338300  | -2. 68596000 |
| C           | 2. 08395800  | 0. 01545700  | 2. 06997000  |
| H           | 2. 67298600  | -0. 86981100 | 2. 34373700  |
| H           | 2. 66191400  | 0. 90801800  | 2. 34369300  |
| H           | 1. 17327000  | 0. 00983600  | 2. 68626000  |
| C           | 3. 20082200  | 0. 02664300  | -0. 85004200 |
| H           | 3. 81257600  | 0. 91771300  | -0. 65846600 |
| H           | 3. 82505000  | -0. 85664000 | -0. 66279600 |
| H           | 2. 93369000  | 0. 02730500  | -1. 91578600 |

SiP5

|    |             |             |             |
|----|-------------|-------------|-------------|
| Si | 0.30503800  | -1.92842200 | 0.00029900  |
| Si | 1.96067200  | -0.25552900 | 0.23233000  |
| Si | 0.85133100  | 1.72399200  | -0.37491200 |
| Si | -1.33998000 | 1.38344100  | 0.40408900  |
| Si | -1.77706200 | -0.83343500 | -0.23514100 |
| C  | 0.66653800  | -2.98568900 | -1.53603800 |
| H  | 1.64400700  | -3.48051500 | -1.45906500 |
| H  | -0.09748500 | -3.76205000 | -1.67702100 |
| H  | 0.67864600  | -2.36265600 | -2.44123200 |
| C  | 3.44014400  | -0.62059800 | -0.90110600 |
| H  | 4.21384500  | 0.15392200  | -0.81485100 |
| H  | 3.90293800  | -1.58719800 | -0.66071300 |
| H  | 3.11735000  | -0.65798600 | -1.95043100 |
| C  | 0.79862400  | 1.79174500  | -2.27506100 |
| H  | 0.12276300  | 2.57695200  | -2.63980600 |
| H  | 1.79618900  | 1.98169700  | -2.69426600 |
| H  | 0.44788200  | 0.83326000  | -2.68674000 |
| C  | 1.65403900  | 3.29883800  | 0.31561200  |
| H  | 2.66473000  | 3.44264500  | -0.08907000 |
| H  | 1.06331600  | 4.19143700  | 0.06991300  |
| H  | 1.73684300  | 3.24087100  | 1.40933600  |
| C  | -2.55757100 | 2.63394300  | -0.34184100 |
| H  | -3.58313900 | 2.45947200  | 0.00968300  |
| H  | -2.28551100 | 3.66659800  | -0.08528300 |
| H  | -2.56080600 | 2.55066200  | -1.43750200 |
| C  | -1.37756500 | 1.46166100  | 2.30276500  |
| H  | -0.98793300 | 2.41257500  | 2.68993200  |
| H  | -2.40148600 | 1.33759600  | 2.68097900  |
| H  | -0.77052000 | 0.65140400  | 2.73345200  |
| C  | -2.33612100 | -0.87127200 | -2.05058600 |
| H  | -2.41106100 | -1.89748800 | -2.43439200 |
| H  | -3.31890700 | -0.39395400 | -2.16607000 |
| H  | -1.62789200 | -0.32615200 | -2.69080500 |
| C  | -3.09220900 | -1.65373000 | 0.86345100  |
| H  | -4.06779700 | -1.16049300 | 0.75862200  |
| H  | -3.22318000 | -2.71433600 | 0.60999200  |
| H  | -2.80012100 | -1.59813400 | 1.92094800  |
| C  | 0.26592300  | -3.02694800 | 1.55000600  |
| H  | -0.51326600 | -3.79720400 | 1.47213700  |
| H  | 1.22685000  | -3.53280700 | 1.71382000  |
| H  | 0.05010500  | -2.42537100 | 2.44414700  |
| C  | 2.53961200  | -0.14626000 | 2.03825400  |
| H  | 2.92875500  | -1.10715500 | 2.40018100  |
| H  | 3.33366500  | 0.60478300  | 2.14855400  |

|             |              |              |              |
|-------------|--------------|--------------|--------------|
| H           | 1. 71274500  | 0. 14882600  | 2. 69949400  |
| <b>SiP6</b> |              |              |              |
| Si          | -1. 71703600 | -1. 45986800 | -0. 32993900 |
| Si          | 0. 40276700  | -2. 20041400 | 0. 34904400  |
| Si          | -2. 12115800 | 0. 75347900  | 0. 33624900  |
| Si          | -0. 40449600 | 2. 19961600  | -0. 34815400 |
| Si          | 1. 71610100  | 1. 45990300  | 0. 32937500  |
| Si          | 2. 12010400  | -0. 75450200 | -0. 33412000 |
| C           | 2. 27647200  | -0. 87085900 | -2. 22407200 |
| H           | 3. 00811600  | -0. 15066100 | -2. 61497500 |
| H           | 2. 60624500  | -1. 87657000 | -2. 51981700 |
| H           | 1. 31607700  | -0. 67886400 | -2. 72223600 |
| C           | 3. 75206600  | -1. 34419500 | 0. 44455100  |
| H           | 3. 97117000  | -2. 38289200 | 0. 15943300  |
| H           | 4. 59957900  | -0. 72246700 | 0. 12404500  |
| H           | 3. 70029900  | -1. 30122100 | 1. 54101700  |
| C           | 0. 72791900  | -3. 90430500 | -0. 43036800 |
| H           | 1. 70210700  | -4. 30713300 | -0. 11945000 |
| H           | -0. 04433100 | -4. 62991600 | -0. 13859300 |
| H           | 0. 72805400  | -3. 83690800 | -1. 52683800 |
| C           | 0. 39496600  | -2. 39279300 | 2. 23904600  |
| H           | -0. 31258000 | -3. 17711800 | 2. 54205600  |
| H           | 1. 38675200  | -2. 67248400 | 2. 62026800  |
| H           | 0. 09245800  | -1. 46277500 | 2. 73962800  |
| C           | -3. 02372500 | -2. 60258800 | 0. 44613700  |
| H           | -4. 03839900 | -2. 31878100 | 0. 13389600  |
| H           | -2. 86175100 | -3. 64920900 | 0. 15296200  |
| H           | -2. 98293200 | -2. 55209100 | 1. 54269000  |
| C           | -1. 87539000 | -1. 53885600 | -2. 22090400 |
| H           | -1. 61616000 | -2. 53168900 | -2. 61279900 |
| H           | -2. 90563900 | -1. 31430800 | -2. 52973700 |
| H           | -1. 21800900 | -0. 80315600 | -2. 70452200 |
| C           | -3. 75429500 | 1. 34343500  | -0. 43970700 |
| H           | -4. 60123400 | 0. 72146000  | -0. 11818200 |
| H           | -3. 97308600 | 2. 38197600  | -0. 15380300 |
| H           | -3. 70416900 | 1. 30093500  | -1. 53626800 |
| C           | -2. 27453000 | 0. 86849700  | 2. 22651500  |
| H           | -2. 60550100 | 1. 87342700  | 2. 52356100  |
| H           | -3. 00415500 | 0. 14671200  | 2. 61827300  |
| H           | -1. 31287000 | 0. 67782800  | 2. 72275400  |
| C           | -0. 39623600 | 2. 39200000  | -2. 23822800 |
| H           | -1. 38948100 | 2. 66395900  | -2. 62120300 |
| H           | 0. 30578700  | 3. 18172500  | -2. 54006200 |

|   |             |            |             |
|---|-------------|------------|-------------|
| H | -0.08553100 | 1.46435600 | -2.73823300 |
| C | -0.72967700 | 3.90338200 | 0.43153200  |
| H | 0.04305500  | 4.62882200 | 0.14057000  |
| H | -1.70350500 | 4.30670600 | 0.12016500  |
| H | -0.73055000 | 3.83552300 | 1.52797800  |
| C | 3.02115900  | 2.60128100 | -0.45149400 |
| H | 2.85994200  | 3.64832800 | -0.15938000 |
| H | 4.03659500  | 2.31788100 | -0.14137300 |
| H | 2.97766800  | 2.54926900 | -1.54787200 |
| C | 1.87787900  | 1.54398800 | 2.21979200  |
| H | 2.90813300  | 1.31815100 | 2.52764500  |
| H | 1.62168000  | 2.53883600 | 2.60859600  |
| H | 1.21954600  | 0.81170900 | 2.70724000  |

**1b**

|    |             |             |             |
|----|-------------|-------------|-------------|
| Fe | -0.00014300 | -1.22345500 | 0.13429700  |
| C  | -1.24580700 | -2.49120700 | 0.08998500  |
| C  | -0.00074100 | -0.83150700 | 1.86793300  |
| C  | 1.24552400  | -2.49124200 | 0.09127800  |
| O  | -2.03516700 | -3.32901000 | 0.07349900  |
| O  | -0.00129400 | -0.60796700 | 3.00103700  |
| O  | 2.03484000  | -3.32910500 | 0.07582200  |
| C  | 0.70853100  | -0.27422300 | -1.53714300 |
| C  | 1.47255000  | 0.24284900  | -0.44622100 |
| C  | -1.47246900 | 0.24321700  | -0.44616200 |
| C  | -0.70856500 | -0.27402100 | -1.53712600 |
| H  | 1.20432700  | -0.85993800 | -2.31591200 |
| H  | -1.20448100 | -0.85964800 | -2.31588600 |
| Si | 1.15434700  | 1.98443700  | 0.25057600  |
| Si | -1.15389100 | 1.98478500  | 0.25041200  |
| C  | 1.91023400  | 3.20760200  | -0.97553500 |
| H  | 2.99769500  | 3.06880200  | -1.04935600 |
| H  | 1.48143700  | 3.06486900  | -1.97749700 |
| H  | 1.72059200  | 4.24676400  | -0.67482200 |
| C  | 1.96276300  | 2.23604200  | 1.93301000  |
| H  | 1.58253400  | 1.54873200  | 2.69889200  |
| H  | 3.05176900  | 2.10934800  | 1.86679400  |
| H  | 1.76467800  | 3.26012900  | 2.27826400  |
| C  | -1.90900500 | 3.20812800  | -0.97600000 |
| H  | -1.71753100 | 4.24720300  | -0.67611100 |
| H  | -1.48110700 | 3.06412200  | -1.97816400 |
| H  | -2.99673500 | 3.07105400  | -1.04896800 |
| C  | -1.96264500 | 2.23675800  | 1.93262100  |
| H  | -1.58267900 | 1.54948300  | 2.69867200  |



|   |             |             |             |
|---|-------------|-------------|-------------|
| H | -1.76459500 | 3.26087400  | 2.27779600  |
| H | -3.05164200 | 2.11011300  | 1.86608300  |
| C | -2.92729600 | -0.08734900 | -0.45003700 |
| C | -3.60036200 | -0.44692700 | 0.72550400  |
| C | -3.67940700 | 0.03218900  | -1.62655100 |
| C | -4.96546700 | -0.70489100 | 0.71776100  |
| H | -3.03421200 | -0.54833000 | 1.65263700  |
| C | -5.04667800 | -0.22282100 | -1.63440100 |
| H | -3.18423200 | 0.34537400  | -2.54705700 |
| C | -5.69554400 | -0.59673300 | -0.46278600 |
| H | -5.46177500 | -0.99892900 | 1.64136100  |
| H | -5.60676100 | -0.12578800 | -2.56339100 |
| H | -6.76466400 | -0.80118300 | -0.46761700 |
| C | 2.92736800  | -0.08775200 | -0.45010300 |
| C | 3.60048400  | -0.44719600 | 0.72544000  |
| C | 3.67945100  | 0.03180800  | -1.62665600 |
| C | 4.96561700  | -0.70505200 | 0.71766900  |
| H | 3.03436100  | -0.54858300 | 1.65259400  |
| C | 5.04673700  | -0.22307800 | -1.63452100 |
| H | 3.18419900  | 0.34494000  | -2.54713700 |
| C | 5.69565100  | -0.59689200 | -0.46289400 |
| H | 5.46197600  | -0.99903300 | 1.64126000  |
| H | 5.60680700  | -0.12601300 | -2.56351500 |
| H | 6.76479400  | -0.80121900 | -0.46772100 |

## 2bTS

|    |             |             |             |
|----|-------------|-------------|-------------|
| Fe | 1.03005500  | 1.30025300  | -0.63294100 |
| C  | 2.76145100  | 1.44179600  | -0.48093200 |
| C  | 0.98098900  | 2.90019100  | 0.10202200  |
| C  | 0.36137700  | 1.79953500  | -2.20541400 |
| O  | 3.91001500  | 1.57046200  | -0.47330100 |
| O  | 0.95208800  | 3.92314400  | 0.63774800  |
| O  | 0.07965900  | 2.12275800  | -3.27645100 |
| C  | -1.08114200 | -0.75817600 | -1.19625100 |
| C  | -2.03347100 | -0.32392700 | -0.33742600 |
| C  | 1.27772500  | -0.64894500 | -0.09003900 |
| C  | 0.38715200  | -0.59864000 | -1.20802700 |
| H  | -1.43074100 | -1.34201500 | -2.05748400 |
| H  | 0.80370300  | -0.93792400 | -2.16042000 |
| Si | -1.60672600 | 0.76075800  | 1.14545000  |
| Si | 0.51672800  | -0.21777800 | 1.60034700  |
| C  | -2.66511900 | 0.24751000  | 2.62941900  |
| H  | -3.68441400 | 0.64042800  | 2.51626900  |
| H  | -2.73838000 | -0.84289600 | 2.71941500  |

|   |              |              |              |
|---|--------------|--------------|--------------|
| H | -2. 25795000 | 0. 64246500  | 3. 57020100  |
| C | -1. 98784100 | 2. 59131000  | 0. 86219300  |
| H | -1. 78018400 | 2. 91963200  | -0. 16315000 |
| H | -3. 05537300 | 2. 76037500  | 1. 06241500  |
| H | -1. 42348400 | 3. 23667400  | 1. 54702200  |
| C | -0. 10487800 | -1. 83858700 | 2. 38321100  |
| H | -0. 50857600 | -1. 66051500 | 3. 38892000  |
| H | -0. 89269400 | -2. 29828900 | 1. 77203700  |
| H | 0. 71549200  | -2. 56314500 | 2. 46873500  |
| C | 1. 71884300  | 0. 63135700  | 2. 78930700  |
| H | 2. 72445000  | 0. 71202800  | 2. 35634300  |
| H | 1. 38660800  | 1. 64955800  | 3. 03065600  |
| H | 1. 79957800  | 0. 07287800  | 3. 73192300  |
| C | 2. 58208800  | -1. 36499200 | -0. 20818500 |
| C | 3. 22751400  | -1. 54700100 | -1. 44101800 |
| C | 3. 20771700  | -1. 89345700 | 0. 92663500  |
| C | 4. 43041700  | -2. 23051300 | -1. 53183000 |
| H | 2. 79936100  | -1. 12023700 | -2. 34801100 |
| C | 4. 41401100  | -2. 58178600 | 0. 83969500  |
| H | 2. 74693200  | -1. 77264200 | 1. 90658300  |
| C | 5. 03163800  | -2. 75770000 | -0. 39087800 |
| H | 4. 90742200  | -2. 34711300 | -2. 50383500 |
| H | 4. 86838600  | -2. 98199900 | 1. 74472400  |
| H | 5. 97565000  | -3. 29456200 | -0. 46354800 |
| C | -3. 42215400 | -0. 79580300 | -0. 51457200 |
| C | -4. 50774500 | 0. 08441300  | -0. 40332700 |
| C | -3. 69315600 | -2. 14619100 | -0. 77373200 |
| C | -5. 81208100 | -0. 36337400 | -0. 57078900 |
| H | -4. 32018100 | 1. 14247200  | -0. 21250600 |
| C | -4. 99773100 | -2. 59660400 | -0. 93757700 |
| H | -2. 86135100 | -2. 84927900 | -0. 82534200 |
| C | -6. 06260700 | -1. 70649000 | -0. 83864300 |
| H | -6. 63842900 | 0. 34174600  | -0. 49443400 |
| H | -5. 18435400 | -3. 65133300 | -1. 13483700 |
| H | -7. 08500600 | -2. 05906300 | -0. 96338100 |

### 3b

|    |              |              |              |
|----|--------------|--------------|--------------|
| Fe | -0. 79301900 | -1. 16551100 | -0. 14251600 |
| C  | -2. 51874800 | -1. 59811500 | -0. 09801400 |
| C  | -0. 42846500 | -2. 24381200 | 1. 16762900  |
| C  | -0. 56714600 | -1. 83752200 | -1. 76868600 |
| O  | -3. 60841800 | -1. 96715600 | -0. 02997800 |
| O  | -0. 25936400 | -2. 96817100 | 2. 06421400  |
| O  | -0. 45618800 | -2. 26216400 | -2. 83712000 |

|    |              |              |              |
|----|--------------|--------------|--------------|
| C  | 1. 01644300  | 1. 17981300  | -1. 03701400 |
| C  | 2. 05091000  | 0. 45937700  | -0. 57779700 |
| C  | -1. 33247300 | 0. 92400100  | -0. 03677300 |
| C  | -0. 40378000 | 0. 77501500  | -1. 09161700 |
| H  | 1. 19307300  | 2. 18359900  | -1. 44826300 |
| H  | -0. 83747100 | 0. 92180900  | -2. 09007500 |
| Si | 1. 61969600  | -1. 31034200 | -0. 08538900 |
| Si | -0. 85723300 | 0. 32328900  | 1. 64538600  |
| C  | 2. 51424500  | -1. 76755500 | 1. 51865600  |
| H  | 3. 58423200  | -1. 54890900 | 1. 39103700  |
| H  | 2. 16404000  | -1. 22494300 | 2. 40346300  |
| H  | 2. 41202200  | -2. 84122100 | 1. 72104800  |
| C  | 2. 30676900  | -2. 55979200 | -1. 33158700 |
| H  | 2. 18423000  | -2. 23736200 | -2. 37224700 |
| H  | 3. 37636800  | -2. 72740900 | -1. 14198000 |
| H  | 1. 80011000  | -3. 52854300 | -1. 21891400 |
| C  | 0. 61451100  | 0. 98258100  | 2. 60261700  |
| H  | 0. 85722500  | 0. 29280700  | 3. 42242600  |
| H  | 1. 51571100  | 1. 15137200  | 2. 00587800  |
| H  | 0. 31780600  | 1. 93647100  | 3. 06140200  |
| C  | -2. 26323100 | 0. 07557900  | 2. 86152800  |
| H  | -3. 21866200 | -0. 11952900 | 2. 36028500  |
| H  | -2. 03354900 | -0. 79151000 | 3. 49718000  |
| H  | -2. 38940400 | 0. 94282000  | 3. 52345800  |
| C  | -2. 72746400 | 1. 34308000  | -0. 35398300 |
| C  | -3. 35536900 | 2. 26219500  | 0. 49221100  |
| C  | -3. 41423300 | 0. 93396600  | -1. 50447200 |
| C  | -4. 62594800 | 2. 75347300  | 0. 20801500  |
| H  | -2. 82616300 | 2. 61429900  | 1. 37887700  |
| C  | -4. 68148000 | 1. 42086100  | -1. 79109600 |
| H  | -2. 95664500 | 0. 20337100  | -2. 17310600 |
| C  | -5. 29494300 | 2. 33303900  | -0. 93448400 |
| H  | -5. 09014000 | 3. 47035200  | 0. 88339000  |
| H  | -5. 19869200 | 1. 08031900  | -2. 68663400 |
| H  | -6. 29059500 | 2. 71147000  | -1. 15890800 |
| C  | 3. 39981400  | 1. 04199700  | -0. 45193500 |
| C  | 4. 54432200  | 0. 28845100  | -0. 74614700 |
| C  | 3. 57562500  | 2. 36315800  | -0. 01582800 |
| C  | 5. 81421500  | 0. 83930000  | -0. 62909000 |
| H  | 4. 43140300  | -0. 73756500 | -1. 09794100 |
| C  | 4. 84518900  | 2. 91463200  | 0. 10471500  |
| H  | 2. 69714000  | 2. 95371800  | 0. 24709300  |
| C  | 5. 97006900  | 2. 15496800  | -0. 20211000 |
| H  | 6. 68813500  | 0. 23798500  | -0. 87499100 |

|   |             |             |              |
|---|-------------|-------------|--------------|
| H | 4. 95730900 | 3. 94151400 | 0. 44974400  |
| H | 6. 96529800 | 2. 58487900 | -0. 10213300 |

#### 4bTS

|    |              |              |              |
|----|--------------|--------------|--------------|
| Fe | 0. 95555300  | 0. 99275600  | -0. 49273100 |
| C  | 2. 70767200  | 1. 31924200  | -0. 63397400 |
| C  | 0. 62412000  | 2. 72188800  | -0. 55994700 |
| C  | 0. 59556700  | 0. 35107300  | -2. 12152900 |
| O  | 3. 81305000  | 1. 61887500  | -0. 75419900 |
| O  | 0. 39849500  | 3. 85691200  | -0. 53346900 |
| O  | 0. 36632700  | -0. 14821600 | -3. 13500200 |
| C  | -1. 17189200 | -1. 89590100 | -0. 06860700 |
| C  | -2. 00005300 | -0. 83036800 | -0. 17986900 |
| C  | 1. 21877000  | -0. 98650200 | -0. 04632000 |
| C  | 0. 27698700  | -1. 96167100 | -0. 02624600 |
| H  | -1. 65309500 | -2. 87678500 | 0. 02903100  |
| H  | 0. 65628700  | -2. 98566200 | 0. 07438400  |
| Si | -1. 42416900 | 0. 95448900  | -0. 28144100 |
| Si | 0. 74375600  | 0. 85654000  | 1. 63500700  |
| C  | -2. 18332600 | 1. 88194700  | 1. 20284400  |
| H  | -3. 27846800 | 1. 87664300  | 1. 09848300  |
| H  | -1. 96458200 | 1. 44036500  | 2. 18718400  |
| H  | -1. 85707200 | 2. 93283800  | 1. 21207000  |
| C  | -2. 19147400 | 1. 83993000  | -1. 76838300 |
| H  | -1. 96431100 | 1. 33468900  | -2. 71585900 |
| H  | -3. 28304800 | 1. 88810000  | -1. 65331600 |
| H  | -1. 82092700 | 2. 87122800  | -1. 83795200 |
| C  | 0. 08089100  | -0. 40946700 | 2. 85130600  |
| H  | -0. 36238500 | 0. 09766700  | 3. 71910200  |
| H  | -0. 64313800 | -1. 09969200 | 2. 40797400  |
| H  | 0. 92758300  | -1. 00870300 | 3. 21980000  |
| C  | 1. 34405900  | 2. 24297500  | 2. 76823700  |
| H  | 1. 91574100  | 3. 00998600  | 2. 23429400  |
| H  | 0. 46861000  | 2. 72465100  | 3. 23240200  |
| H  | 1. 95304600  | 1. 84506600  | 3. 59289800  |
| C  | 2. 62434600  | -1. 45529100 | -0. 00592000 |
| C  | 3. 49728400  | -1. 13490500 | 1. 04045500  |
| C  | 3. 11262900  | -2. 25650400 | -1. 04607200 |
| C  | 4. 80134900  | -1. 61193800 | 1. 06270800  |
| H  | 3. 15439600  | -0. 49549700 | 1. 86116100  |
| C  | 4. 42302800  | -2. 72183800 | -1. 03618200 |
| H  | 2. 44625800  | -2. 49746700 | -1. 87522500 |
| C  | 5. 27137500  | -2. 40614700 | 0. 01993000  |
| H  | 5. 45613400  | -1. 35681900 | 1. 89447400  |

|   |             |             |             |
|---|-------------|-------------|-------------|
| H | 4.78244700  | -3.33551800 | -1.86093100 |
| H | 6.29726400  | -2.76978000 | 0.02886000  |
| C | -3.46118500 | -1.04960800 | -0.06024400 |
| C | -4.34447800 | -0.72487800 | -1.09815100 |
| C | -3.99616600 | -1.56996100 | 1.12564800  |
| C | -5.71265200 | -0.92856300 | -0.95907700 |
| H | -3.94452600 | -0.33874200 | -2.03572400 |
| C | -5.36555100 | -1.76527200 | 1.26855400  |
| H | -3.31927600 | -1.81270100 | 1.94617000  |
| C | -6.22920200 | -1.44507000 | 0.22601300  |
| H | -6.37977800 | -0.68477100 | -1.78465500 |
| H | -5.75964600 | -2.16771600 | 2.20085100  |
| H | -7.30167700 | -1.59703000 | 0.33591700  |

### 5b

|    |             |             |             |
|----|-------------|-------------|-------------|
| Fe | 1.00804500  | 0.95516600  | -0.48432700 |
| C  | 2.77179100  | 1.24640900  | -0.51136000 |
| C  | 0.71172700  | 2.67582300  | -0.76472400 |
| C  | 0.72054700  | 0.23422000  | -2.09198000 |
| O  | 3.88836800  | 1.52033200  | -0.56395400 |
| O  | 0.50439300  | 3.80640400  | -0.89321500 |
| O  | 0.52298200  | -0.29344500 | -3.09732200 |
| C  | -1.13430000 | -1.93911300 | 0.00802100  |
| C  | -1.97064900 | -0.89136700 | -0.17780000 |
| C  | 1.24754700  | -1.01156900 | 0.00351700  |
| C  | 0.31415500  | -1.98800600 | 0.07710000  |
| H  | -1.60896500 | -2.91798400 | 0.14932300  |
| H  | 0.69975700  | -2.99993800 | 0.25130200  |
| Si | -1.40006000 | 0.88338300  | -0.33774200 |
| Si | 0.53820900  | 1.14261300  | 1.60969900  |
| C  | -2.27594900 | 1.84814200  | 1.07023100  |
| H  | -3.35187300 | 1.77869500  | 0.84894500  |
| H  | -2.15250200 | 1.45889300  | 2.09171200  |
| H  | -2.00305000 | 2.91323500  | 1.06422100  |
| C  | -2.10411700 | 1.72534300  | -1.87896700 |
| H  | -1.81271900 | 1.20483900  | -2.79994800 |
| H  | -3.20101700 | 1.73864900  | -1.81918600 |
| H  | -1.76523600 | 2.76640400  | -1.95320100 |
| C  | 0.12774500  | -0.15971200 | 2.90199500  |
| H  | -0.22295400 | 0.29888600  | 3.83506100  |
| H  | -0.63554500 | -0.85150400 | 2.52286100  |
| H  | 1.01338400  | -0.77164700 | 3.12220200  |
| C  | 0.58340300  | 2.77434300  | 2.54968200  |
| H  | 0.58979300  | 3.64928400  | 1.89014500  |

|   |             |             |             |
|---|-------------|-------------|-------------|
| H | -0.24876200 | 2.86090700  | 3.26080500  |
| H | 1.51264800  | 2.79609300  | 3.14039200  |
| C | 2.65390000  | -1.47829600 | 0.08680600  |
| C | 3.47284400  | -1.20845000 | 1.18938400  |
| C | 3.19766000  | -2.21725900 | -0.97142700 |
| C | 4.78521400  | -1.66185900 | 1.23650100  |
| H | 3.07808400  | -0.62858700 | 2.02621400  |
| C | 4.51634100  | -2.65767200 | -0.93355900 |
| H | 2.56956100  | -2.43963900 | -1.83501200 |
| C | 5.31639900  | -2.38273400 | 0.17055900  |
| H | 5.39934100  | -1.44455400 | 2.10936700  |
| H | 4.91939100  | -3.22253800 | -1.77302800 |
| H | 6.34862800  | -2.72695500 | 0.20128500  |
| C | -3.43207800 | -1.11606800 | -0.06773100 |
| C | -4.30857400 | -0.82508100 | -1.12122000 |
| C | -3.97556800 | -1.60675500 | 1.12719600  |
| C | -5.67738000 | -1.02985000 | -0.98753400 |
| H | -3.90293200 | -0.46488000 | -2.06691800 |
| C | -5.34470800 | -1.80730400 | 1.26346900  |
| H | -3.30380700 | -1.82123900 | 1.95990300  |
| C | -6.20145900 | -1.51819000 | 0.20604700  |
| H | -6.33892800 | -0.81056500 | -1.82442100 |
| H | -5.74434000 | -2.18804600 | 2.20253600  |
| H | -7.27408500 | -1.67237000 | 0.31122600  |

**6b**

|    |             |             |             |
|----|-------------|-------------|-------------|
| Fe | -0.96193300 | 1.13481200  | -0.06188400 |
| C  | -2.76054400 | 1.41036800  | -0.22177100 |
| C  | -0.64369000 | 2.89299200  | -0.04687400 |
| C  | -0.60129600 | 0.83734100  | 1.59684500  |
| O  | -3.87818200 | 1.67163400  | -0.25870500 |
| O  | -0.42987100 | 4.02471600  | 0.01687500  |
| O  | -0.36542000 | 0.61508600  | 2.70745200  |
| C  | 1.16924000  | -1.79337800 | 0.03442500  |
| C  | 1.98755600  | -0.71892500 | -0.11484700 |
| C  | -1.20730400 | -0.86466500 | 0.02656600  |
| C  | -0.27280300 | -1.84980400 | -0.01395300 |
| Si | 1.19952700  | 0.88582500  | -0.57425400 |
| C  | 0.09497100  | 0.75493100  | -2.14134000 |
| H  | 0.18537800  | -0.25779200 | -2.54908400 |
| H  | -1.01008100 | 0.92091900  | -2.05943900 |
| H  | 0.43310800  | 1.51721300  | -2.85251400 |
| C  | 2.39513100  | 2.32738900  | -0.69629100 |
| H  | 2.60498800  | 2.76999700  | 0.28576800  |

|   |              |              |              |
|---|--------------|--------------|--------------|
| H | 3. 35259800  | 2. 00817500  | -1. 12738100 |
| H | 1. 97424000  | 3. 11892200  | -1. 32913200 |
| C | 3. 44934800  | -0. 88308200 | 0. 02124000  |
| C | 4. 11216800  | -1. 92777200 | -0. 63708600 |
| C | 4. 21176300  | -0. 01407400 | 0. 81271700  |
| C | 5. 48387800  | -2. 10357700 | -0. 50049200 |
| H | 3. 53694100  | -2. 59616900 | -1. 27778100 |
| C | 5. 58315400  | -0. 19070500 | 0. 95210000  |
| H | 3. 71423100  | 0. 79305600  | 1. 35182200  |
| C | 6. 22584000  | -1. 23574200 | 0. 29473600  |
| H | 5. 97783200  | -2. 92053000 | -1. 02470400 |
| H | 6. 15292200  | 0. 48910300  | 1. 58382200  |
| H | 7. 30077000  | -1. 37130500 | 0. 40062500  |
| C | -2. 61620400 | -1. 32021000 | 0. 05543700  |
| C | -3. 22742000 | -1. 76125600 | -1. 12347600 |
| C | -3. 37024100 | -1. 29403000 | 1. 23392500  |
| C | -4. 56512700 | -2. 14337100 | -1. 12889600 |
| H | -2. 64038800 | -1. 78582500 | -2. 04360000 |
| C | -4. 70425700 | -1. 68253300 | 1. 22768800  |
| H | -2. 90373400 | -0. 95568400 | 2. 16000300  |
| C | -5. 30967200 | -2. 10114800 | 0. 04531500  |
| H | -5. 02738000 | -2. 47630300 | -2. 05734800 |
| H | -5. 27700000 | -1. 65685500 | 2. 15362600  |
| H | -6. 35749700 | -2. 39607700 | 0. 04079300  |
| H | 1. 64694300  | -2. 75793600 | 0. 24155900  |
| H | -0. 66614100 | -2. 87355200 | -0. 02929100 |

### 7bTS

|    |              |              |              |
|----|--------------|--------------|--------------|
| Fe | -0. 04661200 | 1. 02847300  | -0. 10239800 |
| C  | 0. 73729300  | 2. 15051200  | -1. 29249300 |
| C  | 0. 59798000  | 1. 48692500  | 1. 46724200  |
| C  | -1. 47791500 | 2. 05118500  | 0. 09356600  |
| O  | 1. 31163500  | 2. 86252900  | -1. 99026700 |
| O  | 1. 02417100  | 1. 83240700  | 2. 48777100  |
| O  | -2. 40605200 | 2. 72441600  | 0. 21061100  |
| C  | -0. 66822400 | -0. 38193100 | -1. 64223400 |
| C  | -1. 31569200 | -0. 69313200 | -0. 42632600 |
| C  | 1. 41147900  | -0. 34662000 | -0. 65513400 |
| C  | 0. 74731100  | -0. 73684300 | -1. 76604300 |
| Si | -0. 08922700 | -1. 09090200 | 0. 91614800  |
| C  | 0. 88416600  | -2. 70739100 | 0. 94646000  |
| H  | 0. 99737700  | -3. 14923000 | -0. 04900900 |
| H  | 1. 88823800  | -2. 55518200 | 1. 36452700  |
| H  | 0. 35491100  | -3. 41633400 | 1. 59818900  |

|   |             |             |             |
|---|-------------|-------------|-------------|
| C | -0.73245500 | -0.99724200 | 2.69137400  |
| H | -1.24231800 | -0.06305900 | 2.94826200  |
| H | -1.41515200 | -1.83770800 | 2.88567900  |
| H | 0.11731000  | -1.10886000 | 3.38012400  |
| C | -2.79137500 | -0.69263600 | -0.33736300 |
| C | -3.49370400 | -0.28602000 | 0.80523600  |
| C | -3.53306900 | -1.18917800 | -1.41887500 |
| C | -4.87913300 | -0.35384900 | 0.85553300  |
| H | -2.94857800 | 0.11704800  | 1.65684000  |
| C | -4.92030000 | -1.25992900 | -1.36762100 |
| H | -3.01069000 | -1.55051200 | -2.30411000 |
| C | -5.60125700 | -0.84002700 | -0.23089000 |
| H | -5.39943600 | -0.01794300 | 1.75101100  |
| H | -5.46988100 | -1.65109800 | -2.22241600 |
| H | -6.68753900 | -0.89350900 | -0.18860000 |
| C | 2.84609800  | -0.46897300 | -0.41374800 |
| C | 3.56140900  | -1.56035400 | -0.93427400 |
| C | 3.54874100  | 0.48833900  | 0.32834700  |
| C | 4.92735900  | -1.68277600 | -0.72454800 |
| H | 3.02490200  | -2.32766300 | -1.49342700 |
| C | 4.91835600  | 0.36555200  | 0.53601000  |
| H | 3.01618200  | 1.35130600  | 0.72491100  |
| C | 5.61299300  | -0.71919200 | 0.01267900  |
| H | 5.46104500  | -2.53884300 | -1.13488200 |
| H | 5.44471300  | 1.12724800  | 1.10886300  |
| H | 6.68429300  | -0.81733700 | 0.17922400  |
| H | -1.25362200 | -0.08666200 | -2.51691700 |
| H | 1.18094100  | -1.16266000 | -2.67830700 |

### 8b

|    |             |             |             |
|----|-------------|-------------|-------------|
| Fe | 0.00391000  | 1.15583800  | -0.17449700 |
| C  | 1.32361000  | 2.31801800  | -0.43118900 |
| C  | -0.01798300 | 1.19230300  | 1.60708800  |
| C  | -1.26850400 | 2.36261000  | -0.46145200 |
| O  | 2.21041300  | 3.03427400  | -0.59118800 |
| O  | -0.03769500 | 1.29552000  | 2.75630000  |
| O  | -2.11952500 | 3.11730300  | -0.63992200 |
| C  | -0.72415900 | -0.02575400 | -1.67554800 |
| C  | -1.29155800 | -0.51065100 | -0.45721400 |
| C  | 1.27771700  | -0.54135400 | -0.47627200 |
| C  | 0.69965600  | -0.03571500 | -1.68300200 |
| H  | -1.30879600 | 0.40558700  | -2.48946600 |
| H  | 1.27682400  | 0.39469400  | -2.50228800 |
| Si | -0.01747900 | -1.67868500 | 0.29036900  |



|   |             |             |             |
|---|-------------|-------------|-------------|
| C | -0.08258300 | -3.38624600 | -0.50462400 |
| H | -1.00368200 | -3.90979400 | -0.21180700 |
| H | -0.07126200 | -3.30953500 | -1.59971500 |
| H | 0.76670300  | -4.01138600 | -0.19773900 |
| C | -0.03153800 | -1.90260100 | 2.15870000  |
| H | 0.83496900  | -1.44926900 | 2.65435200  |
| H | -0.93277600 | -1.47398400 | 2.61500500  |
| H | -0.02207100 | -2.97557800 | 2.38798800  |
| C | 2.73720200  | -0.53648800 | -0.26614200 |
| C | 3.62296300  | -0.75629200 | -1.32863100 |
| C | 3.27696000  | -0.33950700 | 1.01212600  |
| C | 4.99793900  | -0.77323300 | -1.12106800 |
| H | 3.22493000  | -0.93660900 | -2.32751200 |
| C | 4.64952100  | -0.35431800 | 1.21992300  |
| H | 2.60342200  | -0.14659300 | 1.84812700  |
| C | 5.51772100  | -0.57070000 | 0.15276400  |
| H | 5.66710900  | -0.94888200 | -1.96213500 |
| H | 5.04553400  | -0.18940000 | 2.22077300  |
| H | 6.59413800  | -0.58103600 | 0.31432100  |
| C | -2.74955300 | -0.52322700 | -0.23906100 |
| C | -3.60937800 | -0.99658100 | -1.23849700 |
| C | -3.30920200 | -0.12172600 | 0.98078800  |
| C | -4.98244700 | -1.05923300 | -1.02818900 |
| H | -3.18743700 | -1.33635500 | -2.18540000 |
| C | -4.68100300 | -0.18404800 | 1.19075700  |
| H | -2.65309500 | 0.26417900  | 1.76220400  |
| C | -5.52423500 | -0.65236000 | 0.18687100  |
| H | -5.63273800 | -1.43067600 | -1.81889600 |
| H | -5.09494700 | 0.14435800  | 2.14293800  |
| H | -6.59933800 | -0.69860700 | 0.35105200  |

**1c**

|    |             |             |             |
|----|-------------|-------------|-------------|
| Fe | -0.01922700 | -0.60767000 | 1.31570900  |
| C  | 1.16906700  | -0.09622900 | 2.52708600  |
| C  | 0.08493600  | -2.36664800 | 1.55089000  |
| C  | -1.22413900 | -0.28559900 | 2.58489800  |
| O  | 1.88692500  | 0.19349800  | 3.38231000  |
| O  | 0.19647500  | -3.49862700 | 1.74348900  |
| O  | -1.90457300 | -0.13101800 | 3.50210000  |
| C  | -0.78040400 | 0.53408700  | -0.26789700 |
| C  | -1.51795500 | -0.71547200 | -0.28769700 |
| C  | 1.46077600  | -0.61424300 | -0.20579500 |
| C  | 0.66143300  | 0.58895800  | -0.23607000 |
| Si | -1.04151000 | -2.05808400 | -1.56970900 |

|    |              |              |              |
|----|--------------|--------------|--------------|
| Si | 1. 24454300  | -1. 88134200 | -1. 60217600 |
| C  | -1. 76862800 | -1. 56779800 | -3. 25188600 |
| H  | -2. 86412500 | -1. 49773600 | -3. 25744100 |
| H  | -1. 36882100 | -0. 58634700 | -3. 54750600 |
| H  | -1. 46904400 | -2. 28671800 | -4. 02708900 |
| C  | -1. 57727400 | -3. 81129200 | -1. 06260000 |
| H  | -1. 99103000 | -3. 83994100 | -0. 04657900 |
| H  | -2. 34012600 | -4. 20996500 | -1. 74539100 |
| H  | -0. 72202100 | -4. 49911000 | -1. 08607200 |
| C  | 1. 92590300  | -1. 12979900 | -3. 19870300 |
| H  | 1. 71828500  | -1. 78771500 | -4. 05409500 |
| H  | 1. 46988300  | -0. 15252900 | -3. 41186600 |
| H  | 3. 01390000  | -0. 99175700 | -3. 13607400 |
| C  | 2. 20075900  | -3. 46662000 | -1. 25523900 |
| H  | 1. 88613600  | -3. 96200900 | -0. 32846000 |
| H  | 2. 05924200  | -4. 17690000 | -2. 08143800 |
| H  | 3. 27506000  | -3. 24901200 | -1. 17718100 |
| C  | 2. 92655800  | -0. 55070100 | 0. 11160200  |
| C  | 3. 48480900  | -1. 41633000 | 1. 06184500  |
| C  | 3. 81151700  | 0. 23015700  | -0. 64996100 |
| C  | 4. 85809100  | -1. 47804600 | 1. 27017700  |
| H  | 2. 82678800  | -2. 06164900 | 1. 64404500  |
| C  | 5. 18509200  | 0. 16711300  | -0. 44456700 |
| H  | 3. 41754900  | 0. 90333100  | -1. 41079600 |
| C  | 5. 71701300  | -0. 68366200 | 0. 51889400  |
| H  | 5. 25587100  | -2. 15692100 | 2. 02303000  |
| H  | 5. 84338600  | 0. 79148100  | -1. 04715100 |
| H  | 6. 79277200  | -0. 73076200 | 0. 67920400  |
| C  | -2. 98655900 | -0. 68669800 | 0. 06482500  |
| C  | -3. 57919900 | 0. 24824300  | 0. 93496900  |
| C  | -3. 86628900 | -1. 62753000 | -0. 49620200 |
| C  | -4. 93566500 | 0. 23640600  | 1. 22449900  |
| H  | -2. 97793300 | 1. 02042800  | 1. 40105900  |
| C  | -5. 22814300 | -1. 64563800 | -0. 21485000 |
| H  | -3. 49640900 | -2. 38224700 | -1. 18400000 |
| C  | -5. 77664300 | -0. 71243700 | 0. 65260700  |
| H  | -5. 33571200 | 0. 98303900  | 1. 90879500  |
| H  | -5. 85776800 | -2. 40095400 | -0. 68265900 |
| H  | -6. 84096200 | -0. 72147700 | 0. 88074300  |
| C  | -1. 48853900 | 1. 84977100  | -0. 31285600 |
| C  | -2. 27460700 | 2. 11636800  | -1. 43552900 |
| C  | -1. 34985700 | 2. 84212800  | 0. 66040200  |
| C  | -2. 89135000 | 3. 35199900  | -1. 59547200 |
| H  | -2. 40118300 | 1. 33931100  | -2. 19170000 |

|   |             |            |             |
|---|-------------|------------|-------------|
| C | -1.97093700 | 4.07477600 | 0.50615000  |
| H | -0.75008800 | 2.64208900 | 1.54870200  |
| C | -2.73918100 | 4.33671600 | -0.62533400 |
| H | -3.49557300 | 3.54433600 | -2.48056700 |
| H | -1.85354900 | 4.83653500 | 1.27522500  |
| H | -3.22149000 | 5.30521600 | -0.74693900 |
| C | 1.31067100  | 1.93351300 | -0.31388600 |
| C | 1.23754000  | 2.58497100 | -1.55037500 |
| C | 2.02380200  | 2.53841700 | 0.71891300  |
| C | 1.85053900  | 3.81576300 | -1.74552100 |
| H | 0.67704200  | 2.11718500 | -2.36212800 |
| C | 2.63924200  | 3.77074300 | 0.52521600  |
| H | 2.10294000  | 2.05070700 | 1.68800100  |
| C | 2.55385100  | 4.41461000 | -0.70424800 |
| H | 1.77527600  | 4.30937200 | -2.71306500 |
| H | 3.18801900  | 4.23020400 | 1.34565900  |
| H | 3.03312700  | 5.38109700 | -0.85118100 |

## 2cTS

|    |             |             |             |
|----|-------------|-------------|-------------|
| Fe | 0.97401100  | -0.84245700 | 1.40704900  |
| C  | 2.18957200  | 0.05574800  | 2.24041800  |
| C  | 1.71711500  | -2.41349400 | 1.88541100  |
| C  | -0.26890300 | -0.51585500 | 2.68302200  |
| O  | 3.00398300  | 0.64171800  | 2.80995600  |
| O  | 2.19290700  | -3.39914300 | 2.25106300  |
| O  | -1.05704600 | -0.30253800 | 3.49708100  |
| C  | -0.96140300 | 0.44544400  | -0.16305400 |
| C  | -1.71868000 | -0.69885800 | -0.14203100 |
| C  | 1.49815600  | -0.38528100 | -0.44629600 |
| C  | 0.53094200  | 0.59221900  | 0.04697300  |
| Si | -1.13272800 | -2.50012700 | -0.14022500 |
| Si | 0.91680000  | -2.01863800 | -1.19734600 |
| C  | -2.15451100 | -3.43199200 | -1.43473000 |
| H  | -3.17200300 | -3.59695000 | -1.05321000 |
| H  | -2.23656500 | -2.87926800 | -2.37791000 |
| H  | -1.70765800 | -4.41349500 | -1.64614700 |
| C  | -1.36560300 | -3.50862100 | 1.44247800  |
| H  | -1.10280400 | -2.98574900 | 2.36770300  |
| H  | -2.41339700 | -3.83309600 | 1.51136500  |
| H  | -0.74287700 | -4.41277900 | 1.38375100  |
| C  | 0.32448500  | -1.74012400 | -2.98242800 |
| H  | -0.05244000 | -2.67307500 | -3.42192900 |
| H  | -0.46738800 | -0.98094000 | -3.04211800 |
| H  | 1.17596200  | -1.40546000 | -3.59098900 |

|   |              |              |              |
|---|--------------|--------------|--------------|
| C | 2. 30591600  | -3. 28196700 | -1. 30848200 |
| H | 2. 80257700  | -3. 50093600 | -0. 35783300 |
| H | 1. 90955300  | -4. 22427300 | -1. 71090000 |
| H | 3. 06677500  | -2. 91366800 | -2. 01181500 |
| C | 2. 86272600  | -0. 08261900 | -0. 96898500 |
| C | 4. 03704800  | -0. 42346500 | -0. 29175900 |
| C | 2. 99174300  | 0. 40507000  | -2. 28163500 |
| C | 5. 28649400  | -0. 25377200 | -0. 88319600 |
| H | 3. 97029800  | -0. 84814400 | 0. 70867000  |
| C | 4. 23526200  | 0. 57824100  | -2. 87329000 |
| H | 2. 08647000  | 0. 65536600  | -2. 83966800 |
| C | 5. 39403700  | 0. 25059500  | -2. 17294700 |
| H | 6. 18187900  | -0. 52320900 | -0. 32492200 |
| H | 4. 30019500  | 0. 96694200  | -3. 88862700 |
| H | 6. 37166300  | 0. 38310800  | -2. 63307400 |
| C | -3. 19433900 | -0. 64840800 | -0. 33102300 |
| C | -4. 03308800 | -1. 07621700 | 0. 70503300  |
| C | -3. 77347400 | -0. 29505800 | -1. 55509000 |
| C | -5. 41212900 | -1. 13018400 | 0. 53066000  |
| H | -3. 58885900 | -1. 35182100 | 1. 66420400  |
| C | -5. 15000900 | -0. 35959000 | -1. 73295400 |
| H | -3. 12902300 | 0. 03234800  | -2. 37217900 |
| C | -5. 97509000 | -0. 77568700 | -0. 69136000 |
| H | -6. 04851800 | -1. 45145200 | 1. 35397700  |
| H | -5. 58266900 | -0. 08206400 | -2. 69314100 |
| H | -7. 05344000 | -0. 82419100 | -0. 83269200 |
| C | 0. 95391700  | 2. 00648700  | 0. 37970500  |
| C | 0. 54740700  | 2. 59948000  | 1. 58334300  |
| C | 1. 67084800  | 2. 80676900  | -0. 51402100 |
| C | 0. 84456300  | 3. 92115900  | 1. 88381500  |
| H | -0. 02883300 | 2. 01294500  | 2. 29838400  |
| C | 1. 98347600  | 4. 12967200  | -0. 21356900 |
| H | 1. 97848400  | 2. 40580000  | -1. 47478900 |
| C | 1. 57243800  | 4. 69577400  | 0. 98559000  |
| H | 0. 50733400  | 4. 34510300  | 2. 82839600  |
| H | 2. 54716900  | 4. 72098800  | -0. 93379000 |
| H | 1. 81311200  | 5. 73160000  | 1. 21918700  |
| C | -1. 68858300 | 1. 73350100  | -0. 36798700 |
| C | -1. 46416800 | 2. 46897000  | -1. 53399900 |
| C | -2. 60367200 | 2. 21386700  | 0. 56993100  |
| C | -2. 14775200 | 3. 65678900  | -1. 76285800 |
| H | -0. 74558400 | 2. 09463500  | -2. 26700800 |
| C | -3. 27543600 | 3. 40998800  | 0. 35051200  |
| H | -2. 77989500 | 1. 64287000  | 1. 48249800  |

|           |             |             |             |
|-----------|-------------|-------------|-------------|
| C         | -3.05093100 | 4.13340900  | -0.81697900 |
| H         | -1.96925200 | 4.21598300  | -2.68000400 |
| H         | -3.98055700 | 3.77821700  | 1.09398700  |
| H         | -3.58000700 | 5.06902700  | -0.99077900 |
| <b>3c</b> |             |             |             |
| Fe        | -0.80646200 | -1.19980700 | -0.02747400 |
| C         | -2.49950500 | -1.68332700 | 0.22544100  |
| C         | -0.32082900 | -1.94779500 | 1.45421100  |
| C         | -0.72686700 | -2.23619000 | -1.46115700 |
| O         | -3.54768800 | -2.11225500 | 0.44327100  |
| O         | -0.09122100 | -2.47525700 | 2.47004800  |
| O         | -0.73445400 | -2.97165300 | -2.35306500 |
| C         | 0.98580200  | 1.24058000  | -1.05851100 |
| C         | 2.01340300  | 0.45917600  | -0.67875000 |
| C         | -1.37868100 | 0.90086100  | -0.18077000 |
| C         | -0.44109800 | 0.78581200  | -1.22570300 |
| Si        | 1.59601400  | -1.31668800 | -0.19930200 |
| Si        | -0.87122500 | 0.49128200  | 1.55715100  |
| C         | 2.61290100  | -1.72592300 | 1.34534800  |
| H         | 3.67526600  | -1.57151600 | 1.10879700  |
| H         | 2.36713600  | -1.10381700 | 2.21464600  |
| H         | 2.47989500  | -2.77478600 | 1.63927000  |
| C         | 2.25367900  | -2.55689800 | -1.47403900 |
| H         | 2.01523600  | -2.29526800 | -2.51251200 |
| H         | 3.34699100  | -2.61455100 | -1.37736300 |
| H         | 1.85621700  | -3.56299200 | -1.28419200 |
| C         | 0.62486000  | 1.17384500  | 2.45581300  |
| H         | 0.72412900  | 0.62739400  | 3.40490100  |
| H         | 1.56679800  | 1.08915100  | 1.90746000  |
| H         | 0.45801600  | 2.23178900  | 2.70400800  |
| C         | -2.27621000 | 0.40560300  | 2.79387000  |
| H         | -3.24439900 | 0.20652200  | 2.32068300  |
| H         | -2.06893200 | -0.40626000 | 3.50559800  |
| H         | -2.35898500 | 1.33645500  | 3.37099300  |
| C         | -2.81121100 | 1.25165700  | -0.42750000 |
| C         | -3.30302100 | 2.39296700  | 0.21623500  |
| C         | -3.66423300 | 0.57646500  | -1.30795500 |
| C         | -4.59463300 | 2.85547600  | -0.01579200 |
| H         | -2.65045600 | 2.93700500  | 0.90247100  |
| C         | -4.95558000 | 1.03185300  | -1.53872200 |
| H         | -3.30339200 | -0.30700100 | -1.83335900 |
| C         | -5.42667000 | 2.17399900  | -0.89614600 |
| H         | -4.94916300 | 3.74853500  | 0.49637400  |

|   |             |             |             |
|---|-------------|-------------|-------------|
| H | -5.59934300 | 0.48849800  | -2.22826100 |
| H | -6.43993600 | 2.52743200  | -1.07898100 |
| C | 3.39782900  | 0.95815300  | -0.51464600 |
| C | 4.46096900  | 0.30345200  | -1.15021100 |
| C | 3.69458700  | 2.05607900  | 0.30393300  |
| C | 5.77192400  | 0.73408400  | -0.98127000 |
| H | 4.24813600  | -0.54383600 | -1.80331300 |
| C | 5.00555200  | 2.48100600  | 0.48141900  |
| H | 2.88038700  | 2.59002400  | 0.79454100  |
| C | 6.05022400  | 1.82221700  | -0.15983500 |
| H | 6.58065300  | 0.21554700  | -1.49436900 |
| H | 5.21244200  | 3.33622100  | 1.12313000  |
| H | 7.07691500  | 2.15698400  | -0.02160400 |
| C | -0.81450000 | 0.92738100  | -2.67755000 |
| C | -0.21292600 | 0.09498100  | -3.62533500 |
| C | -1.60705900 | 1.98700800  | -3.13544200 |
| C | -0.43544900 | 0.27609400  | -4.98539100 |
| H | 0.44946100  | -0.70211400 | -3.28960200 |
| C | -1.81998300 | 2.17800200  | -4.49527300 |
| H | -2.04676800 | 2.68217600  | -2.42178100 |
| C | -1.24422800 | 1.31819600  | -5.42548800 |
| H | 0.03223200  | -0.39680800 | -5.70225000 |
| H | -2.43547600 | 3.01228800  | -4.82797900 |
| H | -1.41522300 | 1.46803900  | -6.49032500 |
| C | 1.15451100  | 2.65992900  | -1.48764800 |
| C | 1.98459800  | 2.98306000  | -2.56463300 |
| C | 0.45400700  | 3.68426400  | -0.84497400 |
| C | 2.11560500  | 4.30067400  | -2.98383700 |
| H | 2.51751200  | 2.18350200  | -3.07906400 |
| C | 0.59458800  | 5.00522600  | -1.25598200 |
| H | -0.21082300 | 3.43731100  | -0.01513700 |
| C | 1.42355900  | 5.31609000  | -2.32915600 |
| H | 2.75877200  | 4.53678100  | -3.83007000 |
| H | 0.05041200  | 5.79454100  | -0.73932000 |
| H | 1.52685800  | 6.34859100  | -2.65890700 |

#### 4cTS

|    |             |             |             |
|----|-------------|-------------|-------------|
| Fe | -1.74311000 | -1.60598600 | -0.49514800 |
| C  | -3.51610100 | -1.33485100 | -0.57149600 |
| C  | -2.02017800 | -3.34329400 | -0.59859400 |
| C  | -1.19864700 | -1.13749100 | -2.12748300 |
| O  | -4.66367800 | -1.26778200 | -0.63992600 |
| O  | -2.19103500 | -4.48818200 | -0.61249500 |
| O  | -0.81076800 | -0.75163400 | -3.14355600 |

|    |              |              |              |
|----|--------------|--------------|--------------|
| C  | 1. 26477300  | 0. 43881800  | -0. 11176000 |
| C  | 1. 61612800  | -0. 87545200 | -0. 13315700 |
| C  | -1. 30079000 | 0. 35485100  | -0. 09166800 |
| C  | -0. 10813500 | 1. 01374500  | -0. 07973500 |
| Si | 0. 48188300  | -2. 36563300 | -0. 24023900 |
| Si | -1. 46364900 | -1. 53412400 | 1. 63305100  |
| C  | 0. 83531500  | -3. 53112800 | 1. 23284200  |
| H  | 1. 87971600  | -3. 87091900 | 1. 17140500  |
| H  | 0. 70957500  | -3. 10477600 | 2. 23991300  |
| H  | 0. 19259100  | -4. 42121400 | 1. 16061600  |
| C  | 0. 97120700  | -3. 43709200 | -1. 72040400 |
| H  | 0. 92342000  | -2. 88431600 | -2. 66706300 |
| H  | 1. 99620000  | -3. 80978800 | -1. 58813100 |
| H  | 0. 30644500  | -4. 30754400 | -1. 80167100 |
| C  | -0. 40118500 | -0. 55001700 | 2. 83294100  |
| H  | -0. 00254300 | -1. 22014600 | 3. 60744300  |
| H  | 0. 42024000  | -0. 00722900 | 2. 35435500  |
| H  | -1. 04470900 | 0. 17707300  | 3. 35217500  |
| C  | -2. 53742900 | -2. 60988200 | 2. 75047700  |
| H  | -2. 66205900 | -3. 60802800 | 2. 30896000  |
| H  | -2. 16934200 | -2. 70736400 | 3. 77913000  |
| H  | -3. 54356900 | -2. 16219500 | 2. 78537500  |
| C  | -2. 54956400 | 1. 16560800  | -0. 07666500 |
| C  | -3. 33411600 | 1. 28273700  | 1. 07544000  |
| C  | -3. 00956900 | 1. 77009700  | -1. 25164800 |
| C  | -4. 53823800 | 1. 97637900  | 1. 05890800  |
| H  | -2. 99223700 | 0. 82730900  | 2. 01095900  |
| C  | -4. 21928400 | 2. 45369500  | -1. 27484100 |
| H  | -2. 40941700 | 1. 68077500  | -2. 15815100 |
| C  | -4. 99055100 | 2. 55884400  | -0. 12089300 |
| H  | -5. 12947800 | 2. 05523500  | 1. 97013400  |
| H  | -4. 56304700 | 2. 90684700  | -2. 20354100 |
| H  | -5. 93940100 | 3. 09173100  | -0. 14073400 |
| C  | 3. 04397800  | -1. 27920900 | 0. 00068300  |
| C  | 3. 79830500  | -1. 68894400 | -1. 10418800 |
| C  | 3. 64235300  | -1. 32309900 | 1. 26571700  |
| C  | 5. 11655100  | -2. 10641500 | -0. 95274200 |
| H  | 3. 34466800  | -1. 65874400 | -2. 09588700 |
| C  | 4. 95718100  | -1. 74691400 | 1. 41933900  |
| H  | 3. 06074100  | -1. 01327400 | 2. 13623500  |
| C  | 5. 70030700  | -2. 13864600 | 0. 30974300  |
| H  | 5. 69109100  | -2. 40641200 | -1. 82800100 |
| H  | 5. 40527000  | -1. 76824200 | 2. 41184600  |
| H  | 6. 73099000  | -2. 46843100 | 0. 42911500  |

|   |              |             |              |
|---|--------------|-------------|--------------|
| C | 2. 37684100  | 1. 44318600 | -0. 08059700 |
| C | 3. 11054500  | 1. 70394300 | -1. 23892200 |
| C | 2. 68758000  | 2. 14794500 | 1. 08371200  |
| C | 4. 10817800  | 2. 67260500 | -1. 24422800 |
| H | 2. 87293900  | 1. 15279500 | -2. 14986500 |
| C | 3. 68524400  | 3. 11484700 | 1. 08259200  |
| H | 2. 12369600  | 1. 94870000 | 1. 99638300  |
| C | 4. 39334300  | 3. 38622500 | -0. 08483600 |
| H | 4. 66259800  | 2. 87325400 | -2. 15987900 |
| H | 3. 90861600  | 3. 66267400 | 1. 99687200  |
| H | 5. 16931500  | 4. 15001300 | -0. 08887100 |
| C | -0. 14157600 | 2. 51294500 | 0. 00650900  |
| C | 0. 19404600  | 3. 29262500 | -1. 10297600 |
| C | -0. 45596600 | 3. 15840100 | 1. 20312100  |
| C | 0. 24827500  | 4. 67758900 | -1. 00979100 |
| H | 0. 43230900  | 2. 79778400 | -2. 04577600 |
| C | -0. 40698100 | 4. 54488500 | 1. 30030000  |
| H | -0. 72215100 | 2. 55993200 | 2. 07574800  |
| C | -0. 04547600 | 5. 30854500 | 0. 19576400  |
| H | 0. 52298600  | 5. 26733200 | -1. 88312100 |
| H | -0. 64644700 | 5. 03006800 | 2. 24562000  |
| H | 0. 00223000  | 6. 39364100 | 0. 27191500  |

### 5c

|    |              |              |              |
|----|--------------|--------------|--------------|
| Fe | -1. 79534600 | -1. 55388400 | -0. 47480300 |
| C  | -3. 55479200 | -1. 20650900 | -0. 56233000 |
| C  | -2. 13601300 | -3. 27854600 | -0. 65890500 |
| C  | -1. 21068000 | -1. 09730700 | -2. 09478700 |
| O  | -4. 69718700 | -1. 09537900 | -0. 64521900 |
| O  | -2. 34597000 | -4. 41413200 | -0. 72434100 |
| O  | -0. 78876300 | -0. 74903600 | -3. 11049300 |
| C  | 1. 26599500  | 0. 43959600  | -0. 09059700 |
| C  | 1. 59796400  | -0. 87829400 | -0. 13281600 |
| C  | -1. 29879700 | 0. 39916800  | -0. 11250100 |
| C  | -0. 09766500 | 1. 03379200  | -0. 04653000 |
| Si | 0. 43401300  | -2. 33833900 | -0. 17907400 |
| Si | -1. 50151400 | -1. 75447100 | 1. 65281900  |
| C  | 0. 84132000  | -3. 45555100 | 1. 33207400  |
| H  | 1. 88273600  | -3. 77857400 | 1. 18291800  |
| H  | 0. 80517100  | -3. 00824800 | 2. 33572200  |
| H  | 0. 21224900  | -4. 35784400 | 1. 32899900  |
| C  | 0. 86924500  | -3. 50298000 | -1. 60441600 |
| H  | 0. 75108500  | -3. 02207400 | -2. 58331200 |
| H  | 1. 91331400  | -3. 82929000 | -1. 50283400 |



|   |              |              |              |
|---|--------------|--------------|--------------|
| H | 0. 23505600  | -4. 39864600 | -1. 58375000 |
| C | -0. 63559500 | -0. 64787900 | 2. 90472100  |
| H | -0. 28716600 | -1. 23440800 | 3. 76497100  |
| H | 0. 20812900  | -0. 10649800 | 2. 45907500  |
| H | -1. 34344900 | 0. 10224600  | 3. 28743500  |
| C | -2. 23434200 | -3. 15657700 | 2. 67619400  |
| H | -2. 57441500 | -3. 99436100 | 2. 05659400  |
| H | -1. 53159200 | -3. 52771200 | 3. 43369600  |
| H | -3. 11178500 | -2. 76506000 | 3. 21384800  |
| C | -2. 52438600 | 1. 24508700  | -0. 12334800 |
| C | -3. 30739800 | 1. 43391500  | 1. 02031700  |
| C | -2. 95735500 | 1. 82657500  | -1. 32083400 |
| C | -4. 48532100 | 2. 16947600  | 0. 97046900  |
| H | -2. 98761500 | 0. 99635200  | 1. 96855000  |
| C | -4. 14102600 | 2. 55271900  | -1. 37575200 |
| H | -2. 35473800 | 1. 69110300  | -2. 22002100 |
| C | -4. 91342700 | 2. 72543700  | -0. 23102100 |
| H | -5. 07501600 | 2. 30503400  | 1. 87620400  |
| H | -4. 46189000 | 2. 98774700  | -2. 32125800 |
| H | -5. 84131800 | 3. 29292400  | -0. 27363700 |
| C | 3. 02487200  | -1. 30122100 | -0. 06141500 |
| C | 3. 71882400  | -1. 71603400 | -1. 20318800 |
| C | 3. 68738300  | -1. 34681400 | 1. 17098800  |
| C | 5. 04088400  | -2. 13982600 | -1. 11995800 |
| H | 3. 21423500  | -1. 68280400 | -2. 17009000 |
| C | 5. 00710100  | -1. 77533800 | 1. 25698500  |
| H | 3. 15034900  | -1. 03103900 | 2. 06806000  |
| C | 5. 68964300  | -2. 17176200 | 0. 11056700  |
| H | 5. 56810600  | -2. 44419900 | -2. 02307700 |
| H | 5. 50634400  | -1. 79638900 | 2. 22474800  |
| H | 6. 72408000  | -2. 50482600 | 0. 17619800  |
| C | 2. 39272300  | 1. 42707800  | -0. 07185800 |
| C | 2. 73838700  | 2. 10810900  | 1. 09673700  |
| C | 3. 10248900  | 1. 69770100  | -1. 24251700 |
| C | 3. 74756500  | 3. 06280500  | 1. 08843600  |
| H | 2. 19161900  | 1. 89929500  | 2. 01776000  |
| C | 4. 11200200  | 2. 65411300  | -1. 25466100 |
| H | 2. 83867200  | 1. 16308600  | -2. 15608400 |
| C | 4. 43178200  | 3. 34515500  | -0. 09071800 |
| H | 3. 99832900  | 3. 59308900  | 2. 00593500  |
| H | 4. 64839700  | 2. 86262700  | -2. 17928200 |
| H | 5. 21696100  | 4. 09946100  | -0. 10025600 |
| C | -0. 10750100 | 2. 53095200  | 0. 09282200  |
| C | 0. 21542100  | 3. 34729100  | -0. 99389600 |

|           |             |             |             |
|-----------|-------------|-------------|-------------|
| C         | -0.38948900 | 3.13676700  | 1.31785100  |
| C         | 0.28827900  | 4.72754300  | -0.85237300 |
| H         | 0.43167300  | 2.88382800  | -1.95774500 |
| C         | -0.32256500 | 4.51843500  | 1.46412100  |
| H         | -0.64534000 | 2.51039900  | 2.17378100  |
| C         | 0.02642100  | 5.31755600  | 0.38094400  |
| H         | 0.55382700  | 5.34509300  | -1.70919200 |
| H         | -0.53687400 | 4.97191900  | 2.43106800  |
| H         | 0.08855400  | 6.39868000  | 0.49502000  |
| <b>6c</b> |             |             |             |
| Fe        | 0.03424600  | -1.66920100 | -0.71212300 |
| C         | -0.94721700 | -3.04043300 | -0.29642500 |
| C         | 1.41204300  | -2.70696200 | -1.18234900 |
| C         | -0.21026700 | -0.94672700 | -2.33676400 |
| O         | -1.59646800 | -3.95615800 | -0.00170500 |
| O         | 2.28521300  | -3.39218000 | -1.49346600 |
| O         | -0.45945200 | -0.47383300 | -3.36021400 |
| C         | 0.62028100  | 0.75542700  | 0.12791500  |
| C         | 1.31023600  | -0.35061700 | 0.62806000  |
| C         | -1.41929100 | -0.40731100 | -0.18398300 |
| C         | -0.85060600 | 0.78317600  | 0.14501800  |
| Si        | 0.38743400  | -1.73613100 | 1.51658400  |
| C         | -0.92235300 | -1.32598200 | 2.79835100  |
| H         | -1.12645600 | -0.25045300 | 2.85321500  |
| H         | -1.86746200 | -1.83395300 | 2.56178700  |
| H         | -0.59021900 | -1.67262500 | 3.78547200  |
| C         | 1.47119400  | -3.12350300 | 2.16791300  |
| H         | 2.34114200  | -3.31182300 | 1.52796200  |
| H         | 1.82765400  | -2.92707600 | 3.18803000  |
| H         | 0.87165200  | -4.04478600 | 2.20225700  |
| C         | 2.79544800  | -0.42161400 | 0.54328000  |
| C         | 3.48342900  | -0.35003900 | -0.67416100 |
| C         | 3.54518300  | -0.51762200 | 1.72028800  |
| C         | 4.87127700  | -0.36318500 | -0.70889500 |
| H         | 2.91789000  | -0.26842300 | -1.60322400 |
| C         | 4.93575700  | -0.52475700 | 1.68954000  |
| H         | 3.02541700  | -0.55980300 | 2.67921800  |
| C         | 5.60399000  | -0.44827800 | 0.47243900  |
| H         | 5.38529000  | -0.30463700 | -1.66695600 |
| H         | 5.49710800  | -0.59001500 | 2.62032900  |
| H         | 6.69206400  | -0.45844900 | 0.44200200  |
| C         | 1.30385100  | 1.95322600  | -0.41647000 |
| C         | 0.86754300  | 2.49273600  | -1.63194500 |
| C         | 2.34658800  | 2.58502500  | 0.26960200  |

|   |              |              |              |
|---|--------------|--------------|--------------|
| C | 1. 47941200  | 3. 62104900  | -2. 16314200 |
| H | 0. 04900000  | 2. 00910700  | -2. 16651700 |
| C | 2. 94055900  | 3. 72712200  | -0. 25035100 |
| H | 2. 68737400  | 2. 18114700  | 1. 22225700  |
| C | 2. 51478500  | 4. 24268200  | -1. 47152400 |
| H | 1. 13956700  | 4. 02071300  | -3. 11695800 |
| H | 3. 74311300  | 4. 21613800  | 0. 29909100  |
| H | 2. 98737600  | 5. 13346700  | -1. 88227800 |
| C | -1. 53506200 | 2. 04708900  | 0. 50363000  |
| C | -2. 55949800 | 2. 57777400  | -0. 28807800 |
| C | -1. 15073000 | 2. 74346600  | 1. 65461200  |
| C | -3. 18851600 | 3. 76289600  | 0. 06958500  |
| H | -2. 85543100 | 2. 04954900  | -1. 19480100 |
| C | -1. 77979400 | 3. 93013100  | 2. 01455300  |
| H | -0. 34744400 | 2. 34200300  | 2. 27635300  |
| C | -2. 80272600 | 4. 44232100  | 1. 22297300  |
| H | -3. 98198100 | 4. 16344700  | -0. 55951200 |
| H | -1. 46990900 | 4. 45664500  | 2. 91606500  |
| H | -3. 29702700 | 5. 37175700  | 1. 50110800  |
| C | -2. 86010900 | -0. 68224500 | -0. 19600900 |
| C | -3. 69774100 | -0. 24665400 | 0. 84613300  |
| C | -3. 44430300 | -1. 41506700 | -1. 23936300 |
| C | -5. 05526200 | -0. 53615600 | 0. 84150400  |
| H | -3. 27466800 | 0. 32288000  | 1. 67193800  |
| C | -4. 80733500 | -1. 68468700 | -1. 25482700 |
| H | -2. 81593800 | -1. 77008000 | -2. 05519400 |
| C | -5. 61895200 | -1. 25117200 | -0. 21182100 |
| H | -5. 67839400 | -0. 19810000 | 1. 66821300  |
| H | -5. 23486200 | -2. 24653100 | -2. 08370900 |
| H | -6. 68455100 | -1. 47432200 | -0. 21578400 |

### 7cTS

|    |              |              |              |
|----|--------------|--------------|--------------|
| Fe | -0. 12619900 | -1. 29418400 | 1. 03376600  |
| C  | 0. 48885100  | -2. 93567700 | 1. 09745500  |
| C  | -1. 58098300 | -1. 80761000 | 1. 90029100  |
| C  | 0. 62119100  | -0. 43815000 | 2. 43637900  |
| O  | 0. 89817700  | -4. 01416100 | 1. 21130800  |
| O  | -2. 50076400 | -2. 17389400 | 2. 49346200  |
| O  | 1. 22256900  | 0. 04089400  | 3. 29753700  |
| C  | -0. 65370900 | 0. 61547000  | -0. 04690900 |
| C  | -1. 27103500 | -0. 49749100 | -0. 66741900 |
| C  | 1. 41023400  | -0. 48763700 | -0. 08149600 |
| C  | 0. 81769700  | 0. 72575300  | -0. 25413200 |
| Si | -0. 03549100 | -1. 73542800 | -1. 28751800 |

|   |             |             |             |
|---|-------------|-------------|-------------|
| C | 0.99047000  | -1.39313900 | -2.83630600 |
| H | 1.11030700  | -0.31841500 | -3.01895100 |
| H | 1.99172600  | -1.83799100 | -2.76932500 |
| H | 0.47931400  | -1.84582300 | -3.69757300 |
| C | -0.75894900 | -3.45457900 | -1.59011500 |
| H | -1.60057800 | -3.65590100 | -0.91522600 |
| H | -1.10067600 | -3.56718800 | -2.62855700 |
| H | 0.00110900  | -4.22709500 | -1.41133100 |
| C | -2.73456700 | -0.67286900 | -0.82087100 |
| C | -3.67767700 | -0.35236100 | 0.16652000  |
| C | -3.21026100 | -1.14113600 | -2.05248300 |
| C | -5.03589200 | -0.51156800 | -0.06727700 |
| H | -3.34314000 | 0.02893100  | 1.12914400  |
| C | -4.57135800 | -1.29495400 | -2.29260300 |
| H | -2.49479400 | -1.37153600 | -2.84387600 |
| C | -5.48946000 | -0.98500600 | -1.29650500 |
| H | -5.74724900 | -0.26506900 | 0.71899600  |
| H | -4.91258900 | -1.65976400 | -3.25999800 |
| H | -6.55612200 | -1.11041400 | -1.47493400 |
| C | -1.38420500 | 1.81651500  | 0.44021800  |
| C | -1.08899100 | 2.39135500  | 1.67946300  |
| C | -2.32158800 | 2.45066000  | -0.38352700 |
| C | -1.72774200 | 3.55381000  | 2.09482600  |
| H | -0.35166600 | 1.91881300  | 2.32713500  |
| C | -2.95618500 | 3.61585300  | 0.02823600  |
| H | -2.55123400 | 2.02326500  | -1.35975800 |
| C | -2.66587200 | 4.16859900  | 1.27182900  |
| H | -1.48919200 | 3.98077800  | 3.06744700  |
| H | -3.68163800 | 4.09405200  | -0.62791900 |
| H | -3.16674800 | 5.07905200  | 1.59668000  |
| C | 1.45992400  | 2.02733500  | -0.51012900 |
| C | 2.53343500  | 2.46206900  | 0.27462100  |
| C | 0.99318100  | 2.84947000  | -1.54106800 |
| C | 3.13046000  | 3.69150100  | 0.02620900  |
| H | 2.89029300  | 1.82676900  | 1.08591500  |
| C | 1.59897400  | 4.07362400  | -1.79570900 |
| H | 0.15258700  | 2.51533200  | -2.15117200 |
| C | 2.66823100  | 4.49712100  | -1.01143100 |
| H | 3.96156100  | 4.02290300  | 0.64647200  |
| H | 1.23360500  | 4.70123900  | -2.60688300 |
| H | 3.13934700  | 5.45944600  | -1.20526600 |
| C | 2.83978300  | -0.80363600 | -0.16726000 |
| C | 3.65225100  | -0.25067000 | -1.17366500 |
| C | 3.43876500  | -1.67808400 | 0.74914400  |

|   |             |              |              |
|---|-------------|--------------|--------------|
| C | 5. 00072300 | -0. 56534200 | -1. 25610100 |
| H | 3. 21567600 | 0. 43769100  | -1. 89630000 |
| C | 4. 79277400 | -1. 98722100 | 0. 66917100  |
| H | 2. 83629500 | -2. 10551600 | 1. 54858700  |
| C | 5. 57945400 | -1. 43646800 | -0. 33500200 |
| H | 5. 60598500 | -0. 12568800 | -2. 04752800 |
| H | 5. 23064900 | -2. 66648800 | 1. 39886500  |
| H | 6. 63783100 | -1. 68252800 | -0. 40188500 |

**8c**

|    |              |              |              |
|----|--------------|--------------|--------------|
| Fe | -0. 08660000 | 1. 24920600  | 0. 08705900  |
| C  | 1. 17799400  | 2. 46878700  | 0. 28788400  |
| C  | -0. 26470300 | 0. 85932200  | 1. 82086100  |
| C  | -1. 31424700 | 2. 52881100  | 0. 00783000  |
| O  | 1. 99629300  | 3. 25937700  | 0. 48040900  |
| O  | -0. 38649100 | 0. 69296900  | 2. 95488700  |
| O  | -2. 09083000 | 3. 38047400  | -0. 02577000 |
| C  | -0. 78053200 | 0. 32857400  | -1. 63626200 |
| C  | -1. 31680800 | -0. 42530200 | -0. 53310700 |
| C  | 1. 23408700  | -0. 27921600 | -0. 48781000 |
| C  | 0. 66494600  | 0. 38578400  | -1. 63208000 |
| Si | 0. 03362000  | -1. 64267200 | -0. 04314100 |
| C  | 0. 15638400  | -3. 10059000 | -1. 23464300 |
| H  | -0. 65545100 | -3. 82663600 | -1. 08831500 |
| H  | 0. 10828000  | -2. 74236100 | -2. 27366300 |
| H  | 1. 10773100  | -3. 63589300 | -1. 10707600 |
| C  | 0. 10723400  | -2. 26571200 | 1. 72888300  |
| H  | 1. 06281700  | -1. 98210700 | 2. 19133500  |
| H  | -0. 69733300 | -1. 87222300 | 2. 36071400  |
| H  | 0. 04371300  | -3. 36151600 | 1. 74079400  |
| C  | 2. 68705800  | -0. 39248100 | -0. 24291500 |
| C  | 3. 51159400  | -1. 01333500 | -1. 19352100 |
| C  | 3. 26091100  | 0. 00517300  | 0. 96992400  |
| C  | 4. 86363300  | -1. 20998200 | -0. 94356900 |
| H  | 3. 07948000  | -1. 34176100 | -2. 14003300 |
| C  | 4. 61539900  | -0. 19196800 | 1. 21946800  |
| H  | 2. 63055100  | 0. 47956400  | 1. 72337500  |
| C  | 5. 42295800  | -0. 79790900 | 0. 26320500  |
| H  | 5. 48548400  | -1. 68935700 | -1. 69830100 |
| H  | 5. 03987500  | 0. 13351400  | 2. 16806700  |
| H  | 6. 48334700  | -0. 95093000 | 0. 45691900  |
| C  | -2. 75332800 | -0. 57134600 | -0. 22410400 |
| C  | -3. 19385900 | -1. 77772200 | 0. 34080500  |
| C  | -3. 72106500 | 0. 41748400  | -0. 46484200 |

|   |             |             |             |
|---|-------------|-------------|-------------|
| C | -4.53261300 | -1.99725300 | 0.64432800  |
| H | -2.47234800 | -2.57162200 | 0.54428200  |
| C | -5.05704800 | 0.20404700  | -0.15613800 |
| H | -3.43211800 | 1.36970500  | -0.90289100 |
| C | -5.47277600 | -1.00389500 | 0.39848400  |
| H | -4.83874800 | -2.94837800 | 1.07714700  |
| H | -5.78234500 | 0.99248200  | -0.35100700 |
| H | -6.52197700 | -1.16721300 | 0.63856300  |
| C | -1.58017200 | 0.87472900  | -2.75860000 |
| C | -2.44291800 | 0.00303800  | -3.43153300 |
| C | -1.44636800 | 2.18487800  | -3.22396800 |
| C | -3.15639000 | 0.43181100  | -4.54395400 |
| H | -2.54643300 | -1.02185500 | -3.07180200 |
| C | -2.16399600 | 2.61510700  | -4.33352300 |
| H | -0.76420100 | 2.86690100  | -2.71654100 |
| C | -3.02052400 | 1.74086500  | -4.99641900 |
| H | -3.82262400 | -0.25909700 | -5.05780700 |
| H | -2.05116100 | 3.63974200  | -4.68348300 |
| H | -3.58208300 | 2.07943000  | -5.86552600 |
| C | 1.45607000  | 0.88893900  | -2.78186600 |
| C | 1.23602800  | 0.29204600  | -4.02949600 |
| C | 2.48232600  | 1.82861300  | -2.66403900 |
| C | 2.00931600  | 0.63612000  | -5.13099400 |
| H | 0.44511600  | -0.45177100 | -4.13288800 |
| C | 3.25277300  | 2.17695700  | -3.76771100 |
| H | 2.69335300  | 2.28842900  | -1.70151900 |
| C | 3.01946800  | 1.58451800  | -5.00418800 |
| H | 1.82038200  | 0.16127500  | -6.09241400 |
| H | 4.04416900  | 2.91611200  | -3.65539200 |
| H | 3.62474500  | 1.85921000  | -5.86652500 |
